# Supplementary material
Source: publisher site journal article supplement (https://www.dovepress.com/article/347420)
Supplement: Supplementary file 1 [file get_supplementary_file.php]

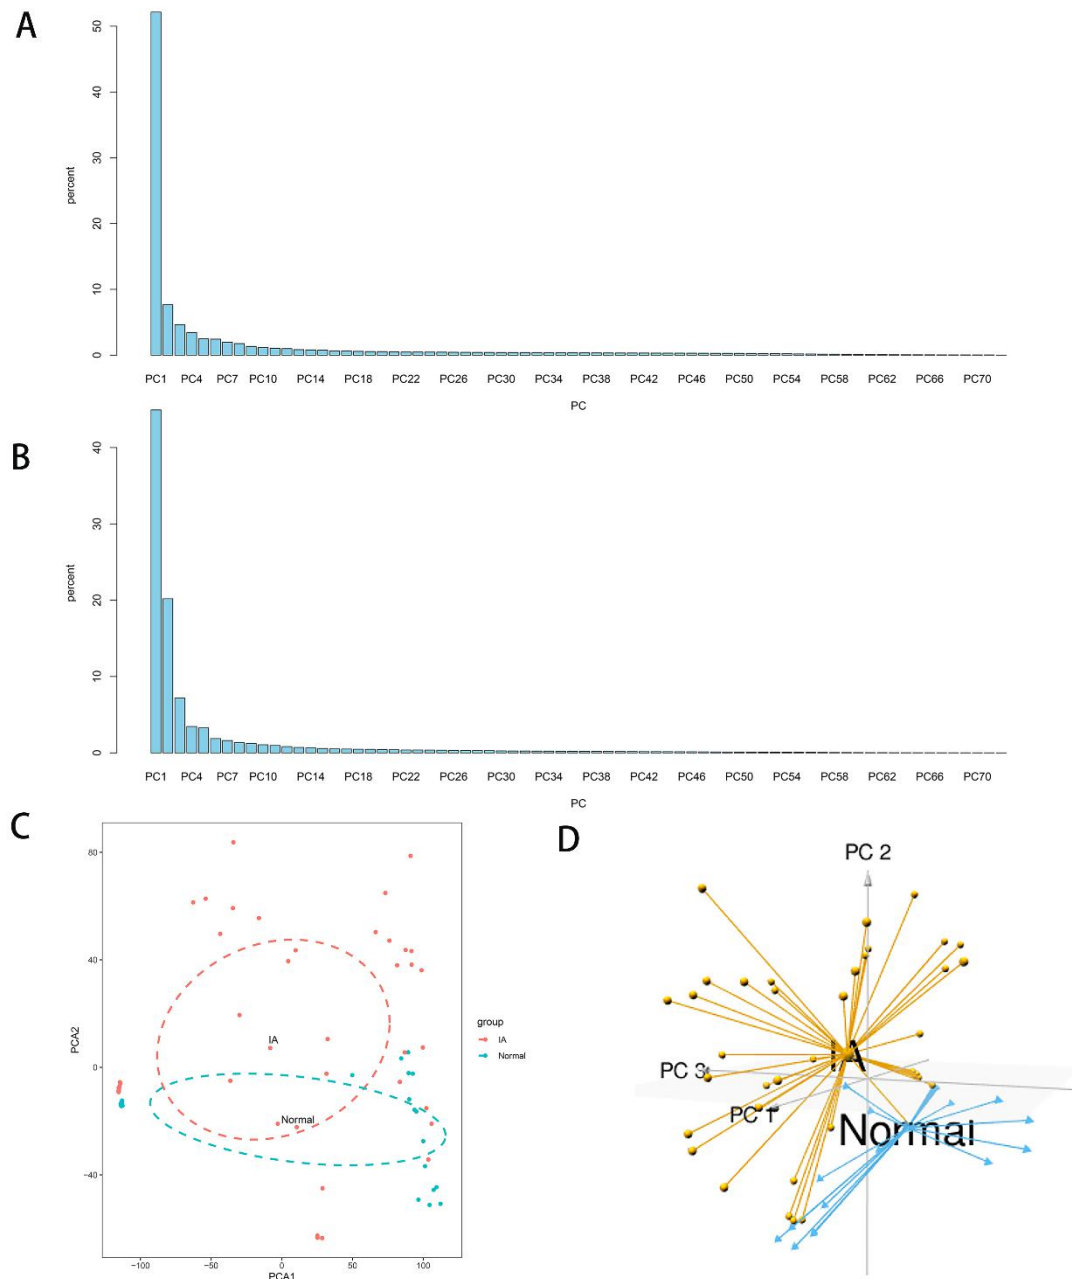

**Figure S1.** Principal Component Analysis (PCA) on the overall genes and the DEGs. **A.** Proportions of variance of PCs in PCA among all genes. **B.** Proportions of variance of PCs in PCA among DEGs. **C.** 2D-PCA plot of all genes. **D.** 3D-PCA graph of all genes.

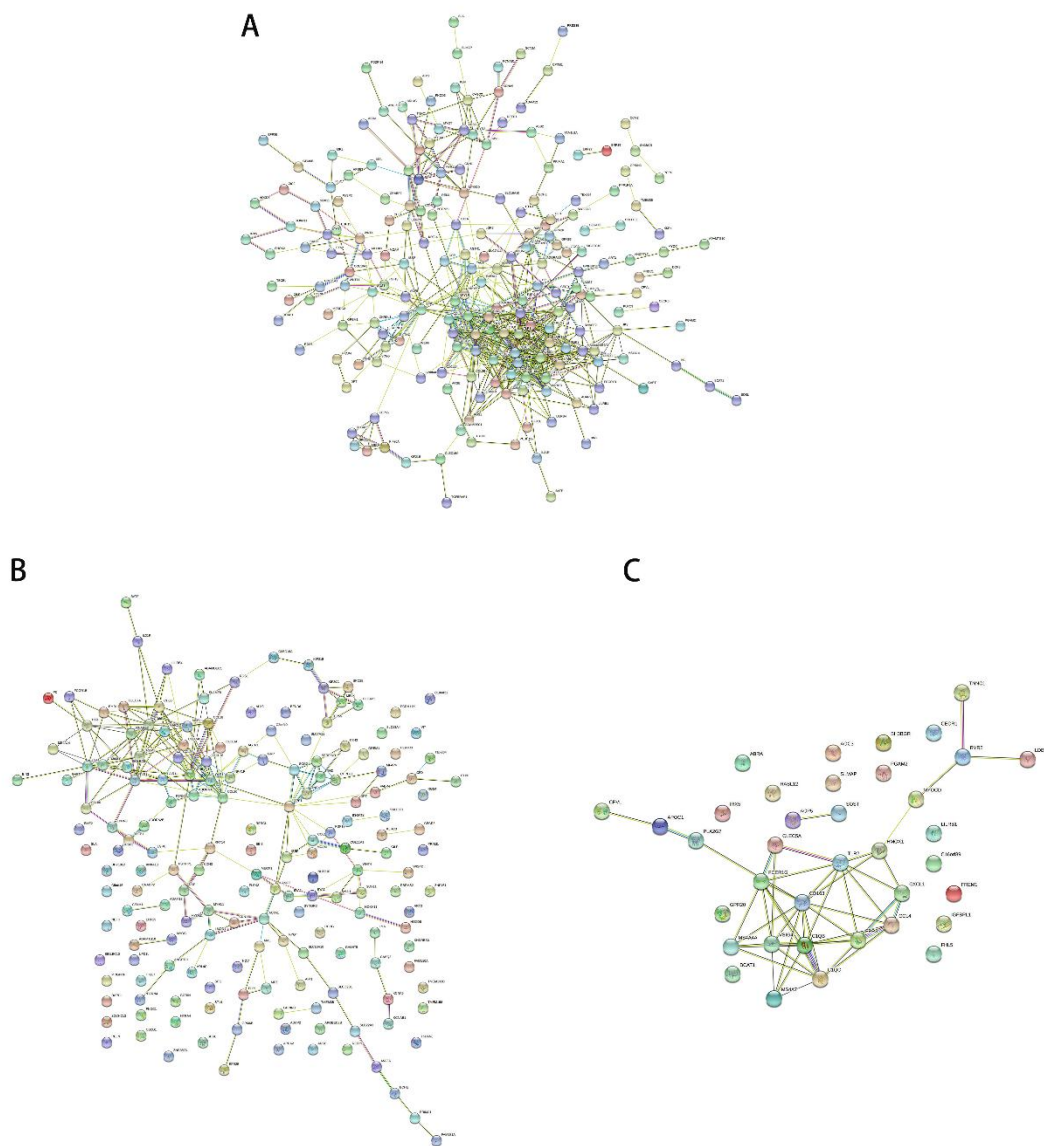

**Figure S2.** PPI networks. **A.** PPI network of all DEGs. **B.** PPI network of DEGs in blue modules. **C.** PPI network of DEGs in pink modules.

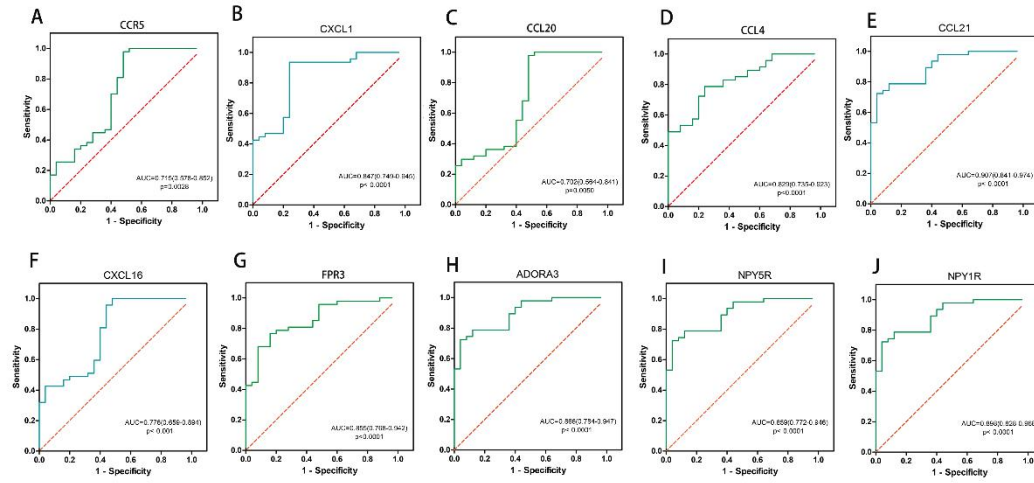

**Figure S3.** ROC analysis of the top 10 DEGs. **A-J.** ROC curves for CCR5, CXCL1, CCL20, CCL4, CCL21, CXCL16, FPR3, ADORA3, NPY5R and NPY1R.

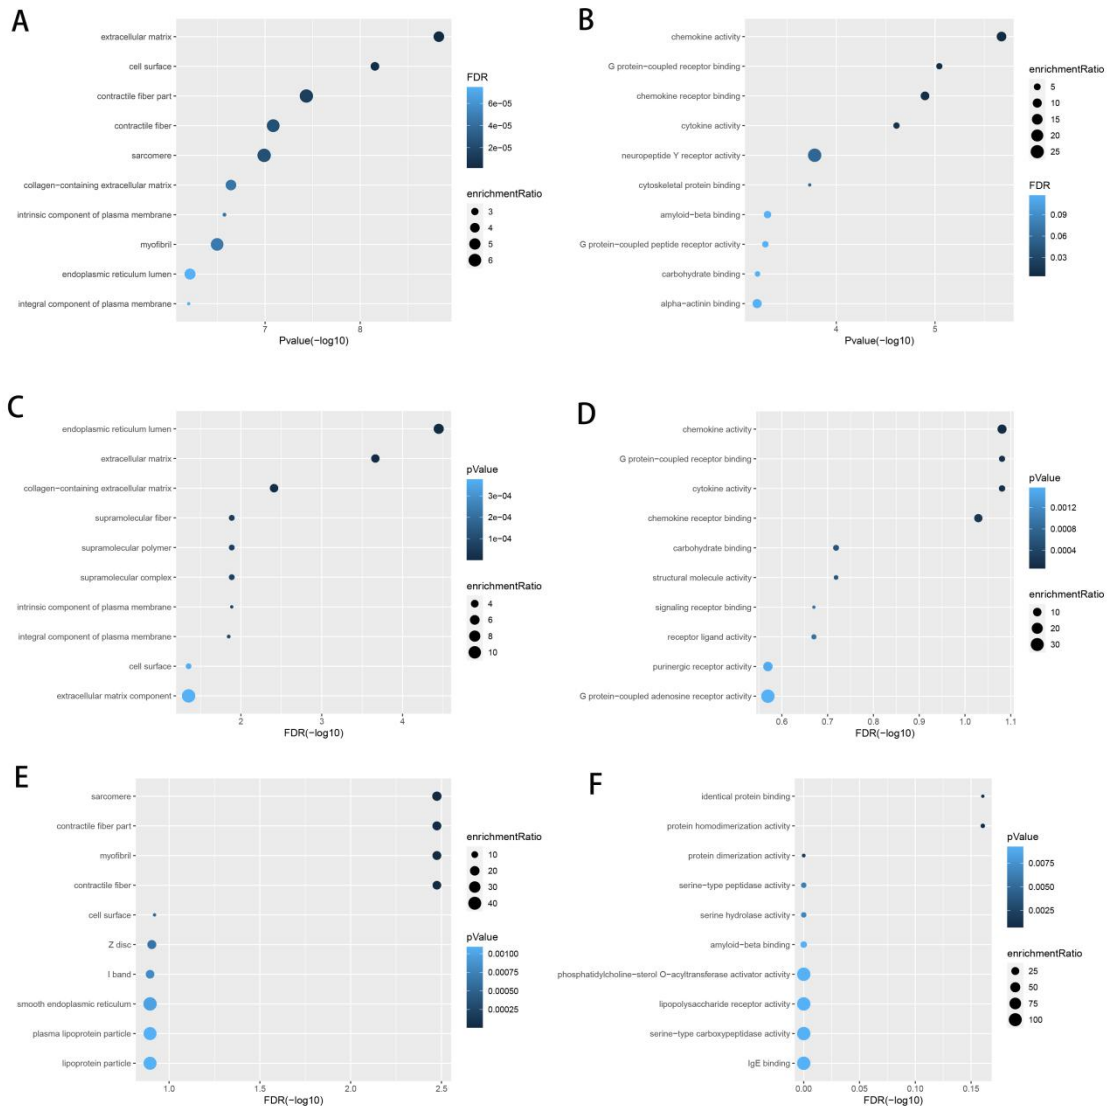

**Figure S4.** GO-CC and GO-MF for DEGs (A, B), blue module (C, D), and pink module (E, F).

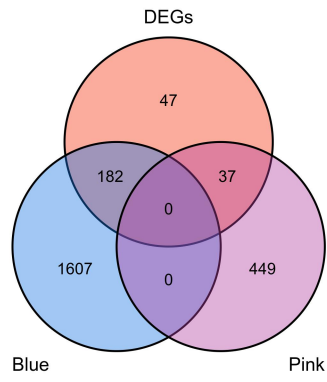

**Figure S5.** Venn Diagram depicting overlap between DEGs, blue and pink modules.

**Table S1\_DEG**

| ID      | logFC            | AveExpr         | t                | P.Value  | adj.P.Val | B               |
|---------|------------------|-----------------|------------------|----------|-----------|-----------------|
| COL11A1 | 4.2640965<br>8   | 7.5261940<br>48 | 11.296167<br>07  | 1.22E-17 | 1.90E-13  | 29.422836<br>9  |
| KHDRBS3 | -1.7870353<br>28 | 7.1103819<br>05 | -10.816880<br>25 | 8.87E-17 | 5.69E-13  | 27.535101<br>01 |
| TREM2   | 2.8724992<br>83  | 7.9090384<br>05 | 10.766838<br>45  | 1.09E-16 | 5.69E-13  | 27.336495<br>6  |
| CDH19   | -2.7828237<br>22 | 6.7009360<br>95 | -9.7785559<br>93 | 7.07E-15 | 2.76E-11  | 23.362215<br>85 |
| PPL     | -2.8989695<br>95 | 7.0539445       | -9.1316659<br>36 | 1.12E-13 | 2.51E-10  | 20.716652<br>68 |
| ORMDL1  | 2.0946796<br>95  | 9.0666492<br>62 | 8.4294055<br>64  | 2.31E-12 | 3.92E-09  | 17.820133<br>77 |
| ERP27   | 1.6791573<br>58  | 7.1073870<br>61 | 8.4034793<br>76  | 2.59E-12 | 3.92E-09  | 17.712931<br>52 |
| ARL4C   | 1.8563248<br>92  | 8.0315188<br>48 | 8.3493213<br>3   | 3.27E-12 | 4.25E-09  | 17.488964<br>49 |
| DOK5    | 1.7654648<br>11  | 8.1104843<br>97 | 8.2929436<br>52  | 4.17E-12 | 4.34E-09  | 17.255785<br>76 |
| RASL12  | -2.1359019<br>67 | 9.4747226<br>94 | -8.2594862<br>72 | 4.81E-12 | 4.70E-09  | 17.117394<br>5  |
| MYOT    | -3.0372713<br>52 | 6.4783607<br>43 | -8.1667333<br>25 | 7.18E-12 | 6.00E-09  | 16.733715<br>9  |
| SLMAP   | -1.7471788<br>88 | 7.8831059<br>73 | -8.1663210<br>07 | 7.19E-12 | 6.00E-09  | 16.732010<br>3  |
| TMEM158 | 1.9217288<br>41  | 7.5247145<br>49 | 8.1509176<br>03  | 7.69E-12 | 6.00E-09  | 16.668292<br>81 |
| MEOX1   | -1.8381592<br>19 | 6.3493646<br>4  | -8.1079323<br>02 | 9.25E-12 | 6.57E-09  | 16.490484<br>21 |
| P2RX1   | -2.5936900<br>54 | 8.2175328<br>21 | -8.0967726<br>09 | 9.71E-12 | 6.59E-09  | 16.444323<br>54 |
| ZIC2    | 3.1579422<br>32  | 7.1607846<br>28 | 8.0175496<br>28  | 1.37E-11 | 8.89E-09  | 16.116654<br>89 |
| ACTA1   | -3.0182510<br>86 | 6.7669134<br>14 | -7.8915191<br>14 | 2.35E-11 | 1.41E-08  | 15.595552<br>62 |
| ANGPTL7 | -2.3013652<br>83 | 6.2073498<br>19 | -7.8769398<br>03 | 2.50E-11 | 1.45E-08  | 15.535289<br>43 |
| RERG    | -2.1805303<br>85 | 7.3608627<br>34 | -7.8666801<br>44 | 2.62E-11 | 1.46E-08  | 15.492884<br>14 |
| IL21R   | 1.9591672<br>5   | 5.9389906<br>31 | 7.8562038<br>14  | 2.74E-11 | 1.48E-08  | 15.449585<br>75 |
| TSPAN8  | -2.7263739       | 8.2531940       | -7.8073416       | 3.38E-11 | 1.70E-08  | 15.247674       |

|         |            |           |            |          |          |           |
|---------|------------|-----------|------------|----------|----------|-----------|
|         | 48         | 32        | 64         |          |          | 77        |
| ANGPTL1 | -2.3396869 | 7.0070134 | -7.5361701 | 1.09E-10 | 4.84E-08 | 14.128536 |
|         | 26         | 02        | 42         |          |          | 09        |
| SDSL    | 2.3718462  | 6.1219583 | 7.4840512  | 1.36E-10 | 5.73E-08 | 13.913795 |
|         | 45         | 74        | 89         |          |          | 26        |
| ITLN1   | -3.1336584 | 7.3935158 | -7.4500654 | 1.57E-10 | 6.46E-08 | 13.773842 |
|         | 55         | 82        | 78         |          |          | 48        |
| TMEM35  | -1.7213537 | 6.5340591 | -7.4301992 | 1.71E-10 | 6.68E-08 | 13.692063 |
|         | 1          | 34        | 61         |          |          | 24        |
| RYR2    | -2.3030593 | 7.0964419 | -7.4301127 | 1.71E-10 | 6.68E-08 | 13.691706 |
|         | 54         | 64        | 02         |          |          | 97        |
| HOXD8   | -1.7519989 | 6.5731796 | -7.4237301 | 1.76E-10 | 6.70E-08 | 13.665437 |
|         | 77         | 42        | 28         |          |          | 89        |
| NPY1R   | -2.9966313 | 7.4454809 | -7.3885501 | 2.04E-10 | 7.60E-08 | 13.520688 |
|         | 55         | 78        | 75         |          |          | 67        |
| AGTR1   | -1.7613649 | 6.5950832 | -7.3750960 | 2.17E-10 | 7.87E-08 | 13.465350 |
|         | 2          | 55        | 25         |          |          | 68        |
| LPHN3   | -2.1399602 | 6.6920238 | -7.3243219 | 2.69E-10 | 9.34E-08 | 13.256615 |
|         | 75         | 18        | 83         |          |          | 39        |
| WISP2   | -2.8203920 | 6.9107454 | -7.2961085 | 3.04E-10 | 1.01E-07 | 13.140701 |
|         | 31         | 13        | 37         |          |          | 07        |
| DPY19L2 | -1.9706996 | 7.0771365 | -7.2071550 | 4.44E-10 | 1.36E-07 | 12.775604 |
|         | 75         | 25        | 9          |          |          | 73        |
| CILP    | -2.2003161 | 7.1995701 | -7.1040502 | 6.90E-10 | 1.93E-07 | 12.353188 |
|         | 56         | 98        | 1          |          |          | 47        |
| ADIPOQ  | -2.8414897 | 6.6818804 | -7.1039682 | 6.91E-10 | 1.93E-07 | 12.352852 |
|         | 63         | 33        | 23         |          |          | 93        |
| MYOC    | -2.2335221 | 6.9164409 | -7.0797499 | 7.66E-10 | 2.10E-07 | 12.253760 |
|         | 76         | 77        | 84         |          |          | 95        |
| CORIN   | 1.5878368  | 5.5939191 | 7.0677169  | 8.06E-10 | 2.13E-07 | 12.204545 |
|         | 65         | 95        | 48         |          |          | 45        |
| FREM1   | -2.0200772 | 6.0604221 | -7.0528627 | 8.59E-10 | 2.20E-07 | 12.143809 |
|         | 48         | 48        | 41         |          |          | 17        |
| ART3    | -1.8618543 | 5.8216133 | -6.9890853 | 1.13E-09 | 2.84E-07 | 11.883266 |
|         | 98         | 34        | 34         |          |          | 16        |
| NEFH    | 1.6067394  | 5.8372065 | 6.9533563  | 1.31E-09 | 3.25E-07 | 11.737477 |
|         | 72         | 27        | 93         |          |          | 38        |
| COL10A1 | 2.4706043  | 7.6401374 | 6.9140067  | 1.55E-09 | 3.72E-07 | 11.577063 |
|         | 59         | 1         | 08         |          |          | 07        |
| XKR4    | -2.3209306 | 5.9405160 | -6.7983494 | 2.53E-09 | 5.65E-07 | 11.106528 |
|         | 81         | 16        | 95         |          |          | 81        |
| RERGL   | -2.9100466 | 7.8860880 | -6.7874255 | 2.65E-09 | 5.75E-07 | 11.062164 |
|         | 25         | 05        | 91         |          |          | 25        |
| SH3BGR  | -1.6739583 | 8.5011005 | -6.7749526 | 2.80E-09 | 5.98E-07 | 11.011525 |

|         |            |           |            |          |          |           |
|---------|------------|-----------|------------|----------|----------|-----------|
|         | 83         | 86        | 67         |          |          | 83        |
| DAPL1   | 3.1690444  | 5.9668075 | 6.6895856  | 4.01E-09 | 8.21E-07 | 10.665451 |
|         | 48         | 91        | 05         |          |          | 62        |
| ADORA2  | 2.0663213  | 6.5373793 | 6.6873323  | 4.05E-09 | 8.21E-07 | 10.656329 |
| B       | 78         | 18        | 27         |          |          | 2         |
| SLC7A11 | 2.5937224  | 6.9069454 | 6.6296461  | 5.16E-09 | 1.02E-06 | 10.423009 |
|         | 79         | 99        | 54         |          |          | 96        |
| APOC1   | 2.5010162  | 8.3523711 | 6.6086571  | 5.64E-09 | 1.09E-06 | 10.338226 |
|         | 51         | 36        | 74         |          |          | 5         |
| CCL21   | -2.2469556 | 6.1854617 | -6.5229133 | 8.09E-09 | 1.47E-06 | 9.9925027 |
|         | 71         | 04        | 65         |          |          | 58        |
| FHL5    | -1.6984390 | 6.8342591 | -6.4905254 | 9.27E-09 | 1.66E-06 | 9.8621869 |
|         | 73         | 46        | 76         |          |          | 39        |
| AIM1    | 2.1846346  | 8.8781649 | 6.4805204  | 9.67E-09 | 1.72E-06 | 9.8219619 |
|         | 42         | 29        | 08         |          |          | 37        |
| MPZ     | -2.0464818 | 7.1000575 | -6.4578406 | 1.06E-08 | 1.84E-06 | 9.7308343 |
|         | 09         | 56        | 04         |          |          | 36        |
| GAPT    | 1.6926232  | 6.1611290 | 6.4557927  | 1.07E-08 | 1.84E-06 | 9.7226100 |
|         | 72         | 72        | 99         |          |          | 8         |
| BIN2    | 1.5541720  | 7.4447120 | 6.3958261  | 1.38E-08 | 2.23E-06 | 9.4820636 |
|         | 25         | 21        | 2          |          |          | 79        |
| PLEK2   | 1.8198381  | 6.6472712 | 6.3535509  | 1.64E-08 | 2.59E-06 | 9.3128268 |
|         | 23         | 23        | 88         |          |          | 97        |
| MESDC2  | 1.6699056  | 8.5117267 | 6.3331050  | 1.79E-08 | 2.77E-06 | 9.2310817 |
|         | 76         | 01        | 06         |          |          | 98        |
| SOST    | -2.9223348 | 6.8694572 | -6.3013181 | 2.04E-08 | 3.10E-06 | 9.1041331 |
|         | 52         | 69        |            |          |          | 35        |
| ADORA3  | 2.0558281  | 6.9308472 | 6.2894385  | 2.15E-08 | 3.23E-06 | 9.0567330 |
|         | 2          | 94        | 06         |          |          | 59        |
| CCM2    | 2.2007272  | 9.0126573 | 6.2775529  | 2.26E-08 | 3.35E-06 | 9.0093336 |
|         | 21         | 52        | 96         |          |          | 12        |
| RBPMS2  | -3.1095280 | 8.4678676 | -6.2686957 | 2.34E-08 | 3.42E-06 | 8.9740265 |
|         | 72         | 07        | 07         |          |          | 96        |
| C5orf46 | 2.8188633  | 6.8206046 | 6.2404215  | 2.63E-08 | 3.81E-06 | 8.8614114 |
|         | 25         | 6         |            |          |          | 06        |
| TNC     | -2.3347264 | 7.8760319 | -6.2131128 | 2.95E-08 | 4.15E-06 | 8.7527763 |
|         | 18         | 46        | 1          |          |          | 96        |
| PRIMA1  | -2.5918754 | 7.2110761 | -6.2042066 | 3.06E-08 | 4.27E-06 | 8.7173763 |
|         | 92         | 07        | 57         |          |          | 83        |
| KRT14   | 2.2612620  | 7.8838811 | 6.1962821  | 3.16E-08 | 4.37E-06 | 8.6858902 |
|         | 38         | 41        | 3          |          |          | 26        |
| MRGPRF  | -1.8482420 | 8.8505000 | -6.1754274 | 3.45E-08 | 4.70E-06 | 8.6030842 |
|         | 12         | 61        | 59         |          |          | 74        |
| MYOM1   | -1.9508732 | 7.6101213 | -6.1723542 | 3.49E-08 | 4.70E-06 | 8.5908885 |



|         |            |           |            |          |          |           |
|---------|------------|-----------|------------|----------|----------|-----------|
|         | 98         | 79        | 69         |          |          | 87        |
| SHOX2   | -2.1380539 | 6.4596476 | -6.1687301 | 3.55E-08 | 4.71E-06 | 8.5765090 |
|         | 59         | 1         | 97         |          |          | 22        |
| MAOA    | -1.6134286 | 7.0324692 | -6.1413261 | 3.97E-08 | 5.13E-06 | 8.4678548 |
|         | 78         | 69        | 35         |          |          | 32        |
| PDZRN4  | -2.2470571 | 7.4088169 | -6.1273090 | 4.21E-08 | 5.37E-06 | 8.4123333 |
|         | 25         | 97        | 5          |          |          | 4         |
| GPRIN3  | 1.8754309  | 6.2966608 | 6.1195353  | 4.35E-08 | 5.46E-06 | 8.3815579 |
|         | 61         | 07        | 47         |          |          | 5         |
| LGR6    | -1.6017734 | 7.1828764 | -6.0987894 | 4.74E-08 | 5.87E-06 | 8.2994836 |
|         | 41         | 16        | 4          |          |          | 78        |
| SLITRK6 | -1.7384335 | 5.3615581 | -6.0959389 | 4.79E-08 | 5.89E-06 | 8.2882132 |
|         | 81         | 37        | 73         |          |          | 67        |
| DPT     | -1.6573905 | 6.8020886 | -6.0718101 | 5.30E-08 | 6.46E-06 | 8.1928744 |
|         | 52         | 09        | 76         |          |          | 9         |
| CRABP2  | 1.7438414  | 7.7236337 | 6.0597511  | 5.57E-08 | 6.74E-06 | 8.1452691 |
|         | 53         | 97        | 01         |          |          | 58        |
| MS4A14  | 2.0004228  | 7.5137447 | 6.0380768  | 6.09E-08 | 7.26E-06 | 8.0597792 |
|         | 03         | 78        | 83         |          |          | 93        |
| VIT     | -1.5584948 | 6.9907466 | -6.0292875 | 6.31E-08 | 7.47E-06 | 8.0251384 |
|         | 12         | 14        | 73         |          |          | 67        |
| PCP4    | -2.3862223 | 6.4885072 | -6.0240607 | 6.45E-08 | 7.57E-06 | 8.0045458 |
|         | 62         |           | 87         |          |          | 49        |
| SNX11   | 1.6099192  | 8.9661338 | 6.0018261  | 7.06E-08 | 8.17E-06 | 7.9170077 |
|         | 55         | 75        | 86         |          |          | 92        |
| KCNAB1  | -1.5959781 | 6.9138355 | -5.9933454 | 7.32E-08 | 8.34E-06 | 7.8836459 |
|         | 61         | 92        | 95         |          |          | 47        |
| SLC13A4 | 1.9840804  | 6.7819682 | 5.8811841  | 1.16E-07 | 1.23E-05 | 7.4438517 |
|         | 02         | 61        | 67         |          |          | 57        |
| MIAT    | 2.1444810  | 6.8613804 | 5.8806861  | 1.16E-07 | 1.23E-05 | 7.4419052 |
|         | 13         | 55        | 96         |          |          | 51        |
| NPY5R   | -1.6548439 | 6.6030659 | -5.8717785 | 1.20E-07 | 1.26E-05 | 7.4070958 |
|         | 68         | 84        | 9          |          |          | 9         |
| RNASE2  | 1.6126042  | 6.6110738 | 5.8334944  | 1.41E-07 | 1.46E-05 | 7.2576905 |
|         | 14         | 52        | 22         |          |          | 25        |
| CDH3    | 2.0011067  | 5.8657118 | 5.8235354  | 1.47E-07 | 1.51E-05 | 7.2188797 |
|         | 59         | 63        | 7          |          |          | 79        |
| FOXF2   | 1.6397202  | 7.0273772 | 5.7683075  | 1.84E-07 | 1.78E-05 | 7.0040686 |
|         | 38         | 53        | 57         |          |          | 03        |
| LAIR1   | 1.6546017  | 7.3727116 | 5.7632655  | 1.87E-07 | 1.81E-05 | 6.9844930 |
|         | 33         | 64        | 46         |          |          | 74        |
| RGS6    | -2.0772082 | 5.8797824 | -5.7445457 | 2.02E-07 | 1.90E-05 | 6.9118664 |
|         | 43         | 38        | 06         |          |          | 27        |
| CASQ2   | -3.1623783 | 8.3856276 | -5.7422789 | 2.04E-07 | 1.90E-05 | 6.9030778 |

|         |            |           |            |          |          |           |
|---------|------------|-----------|------------|----------|----------|-----------|
|         | 37         | 8         | 46         |          |          | 43        |
| DSP     | 2.0684613  | 11.672046 | 5.7306340  | 2.14E-07 | 1.94E-05 | 6.8579482 |
|         | 48         | 97        | 7          |          |          | 93        |
| GPR20   | -2.4646365 | 6.3504550 | -5.7132343 | 2.29E-07 | 2.05E-05 | 6.7905768 |
|         | 83         | 35        | 08         |          |          |           |
| KCNA5   | -2.5744640 | 7.4085926 | -5.6605261 | 2.84E-07 | 2.43E-05 | 6.5869451 |
|         | 53         | 65        | 71         |          |          | 14        |
| CD300LF | 1.6241242  | 7.3047187 | 5.6586235  | 2.86E-07 | 2.43E-05 | 6.5796076 |
|         | 57         | 84        | 86         |          |          | 08        |
| CLEC5A  | 1.8460495  | 7.0870138 | 5.6505054  | 2.96E-07 | 2.50E-05 | 6.5483094 |
|         | 34         | 09        | 66         |          |          | 92        |
| RGS1    | 1.6436848  | 7.4366993 | 5.6400026  | 3.08E-07 | 2.58E-05 | 6.5078421 |
|         | 08         | 61        | 25         |          |          | 21        |
| WNT11   | -1.9507059 | 5.8681662 | -5.6309483 | 3.20E-07 | 2.64E-05 | 6.4729784 |
|         | 84         | 8         | 37         |          |          | 51        |
| BCHE    | -2.1007889 | 5.6798334 | -5.6206135 | 3.34E-07 | 2.74E-05 | 6.4332096 |
|         | 83         | 04        | 29         |          |          | 47        |
| BCAT1   | 1.5451166  | 7.4497870 | 5.6090265  | 3.50E-07 | 2.81E-05 | 6.3886549 |
|         | 18         | 6         | 39         |          |          | 22        |
| SCG2    | 1.8755699  | 6.9219911 | 5.6029063  | 3.58E-07 | 2.83E-05 | 6.3651353 |
|         | 44         | 53        | 72         |          |          | 76        |
| FPR3    | 1.6241834  | 6.7185857 | 5.5835263  | 3.87E-07 | 3.02E-05 | 6.2907227 |
|         | 62         | 62        | 42         |          |          | 58        |
| IP6K3   | -1.9180813 | 5.4317631 | -5.5591033 | 4.27E-07 | 3.26E-05 | 6.1970866 |
|         | 49         | 54        | 38         |          |          | 88        |
| EME2    | 3.6326374  | 8.3355171 | 5.5586902  | 4.28E-07 | 3.26E-05 | 6.1955042 |
|         | 53         | 6         | 48         |          |          | 82        |
| IBSP    | 1.9522086  | 5.5564973 | 5.5510624  | 4.41E-07 | 3.33E-05 | 6.1662927 |
|         | 88         | 68        | 01         |          |          | 29        |
| HEATR3  | 1.6731349  | 7.9241678 | 5.5477652  | 4.47E-07 | 3.34E-05 | 6.1536706 |
|         | 86         | 33        | 29         |          |          | 82        |
| OXTR    | 1.8354960  | 7.2925084 | 5.5166668  | 5.06E-07 | 3.71E-05 | 6.0347646 |
|         | 98         | 51        | 48         |          |          | 19        |
| FHOD3   | -1.6539814 | 7.1327636 | -5.5133304 | 5.13E-07 | 3.73E-05 | 6.0220232 |
|         | 41         | 3         | 59         |          |          | 43        |
| C2orf40 | -2.2156716 | 9.8853608 | -5.5099701 | 5.20E-07 | 3.74E-05 | 6.0091934 |
|         | 93         | 02        | 19         |          |          | 46        |
| DUXAP10 | 2.6272400  | 7.5951861 | 5.5014064  | 5.38E-07 | 3.82E-05 | 5.9765111 |
|         | 26         | 52        | 34         |          |          | 21        |
| SLCO2B1 | 1.6941194  | 7.1744342 | 5.4994791  | 5.42E-07 | 3.83E-05 | 5.9691586 |
|         | 18         | 39        | 72         |          |          | 96        |
| PPP1R9A | -1.7422519 | 5.8779589 | -5.4628837 | 6.28E-07 | 4.34E-05 | 5.8297420 |
|         | 35         | 14        | 41         |          |          | 72        |
| HMOX1   | 2.1181118  | 9.1972111 | 5.4370967  | 6.96E-07 | 4.78E-05 | 5.7317251 |

|          |            |           |            |          |           |           |
|----------|------------|-----------|------------|----------|-----------|-----------|
|          | 38         | 79        | 37         |          |           | 36        |
| ERP29    | -1.7418145 | 9.8489073 | -5.4347183 | 7.02E-07 | 4.79E-05  | 5.7226942 |
|          | 51         | 8         | 43         |          |           | 02        |
| EMR1     | 2.6134132  | 6.7884183 | 5.4304474  | 7.14E-07 | 4.85E-05  | 5.7064814 |
|          | 89         | 16        | 95         |          |           | 9         |
| SCN3A    | -1.7308810 | 6.6454675 | -5.4020368 | 8.00E-07 | 5.27E-05  | 5.5987623 |
|          | 8          | 88        |            |          |           | 43        |
| PC       | 1.5383546  | 6.7177556 | 5.3847451  | 8.57E-07 | 5.53E-05  | 5.5333141 |
|          | 12         | 33        | 89         |          |           | 97        |
| ITIH2    | 2.4673608  | 7.4179083 | 5.3478784  | 9.91E-07 | 6.22E-05  | 5.3940641 |
|          | 08         | 32        | 06         |          |           |           |
| LDB3     | -1.8260657 | 8.0934663 | -5.3424760 | 1.01E-06 | 6.30E-05  | 5.3736920 |
|          | 95         | 61        | 02         |          |           | 17        |
| CXCL14   | -2.1099120 | 7.2181797 | -5.3131814 | 1.14E-06 | 6.78E-05  | 5.2633746 |
|          | 76         | 17        | 04         |          |           | 75        |
| TAC1     | -2.2511141 | 6.0088582 | -5.2989821 | 1.20E-06 | 7.01E-05  | 5.2099954 |
|          | 85         | 07        | 7          |          |           | 95        |
| EYA1     | 1.7802437  | 6.0437661 | 5.2930101  | 1.23E-06 | 7.12E-05  | 5.1875630 |
|          | 65         | 99        | 75         |          |           | 95        |
| SPP1     | 2.0831742  | 8.0621650 | 5.2896079  | 1.25E-06 | 7.19E-05  | 5.1747884 |
|          | 93         | 86        | 98         |          |           | 31        |
| LILRB1   | 1.7530654  | 6.1284833 | 5.2843917  | 1.27E-06 | 7.31E-05  | 5.1552091 |
|          | 77         | 15        | 79         |          |           | 16        |
| SALL1    | 2.4562322  | 5.6078725 | 5.2832350  | 1.28E-06 | 7.31E-05  | 5.1508682 |
|          | 39         | 78        | 11         |          |           | 5         |
| CECR1    | 1.6427408  | 8.4256999 | 5.2774103  | 1.31E-06 | 7.44E-05  | 5.1290170 |
|          | 11         | 65        | 86         |          |           | 6         |
| GPIHBP1  | -1.5036228 | 6.1252591 | -5.2681593 | 1.36E-06 | 7.60E-05  | 5.0943328 |
|          | 95         | 88        | 52         |          |           | 68        |
| CPVL     | 1.5343191  | 8.7061385 | 5.2625960  | 1.39E-06 | 7.71E-05  | 5.0734874 |
|          | 45         | 72        | 73         |          |           | 87        |
| CHL1     | -1.5938096 | 5.4865246 | -5.2505026 | 1.46E-06 | 8.03E-05  | 5.0282066 |
|          | 64         | 19        | 5          |          |           | 79        |
| SIGLEC10 | 1.7033260  | 7.1049110 | 5.2422310  | 1.50E-06 | 8.19E-05  | 4.9972617 |
|          | 86         | 38        | 72         |          |           | 71        |
| SVIP     | -1.5040376 | 8.1020152 | -5.2248727 | 1.61E-06 | 8.64E-05  | 4.9323911 |
|          | 36         | 93        | 19         |          |           | 64        |
| UFD1L    | -1.5230579 | 9.7936526 | -5.2103422 | 1.70E-06 | 9.11E-05  | 4.8781611 |
|          | 66         | 15        | 82         |          |           | 44        |
| SLAMF8   | 1.7570250  | 7.5163161 | 5.1729650  | 1.97E-06 | 0.0001030 | 4.7389688 |
|          | 38         | 58        | 11         |          | 3         | 28        |
| MAL      | -1.8766023 | 6.9018612 | -5.1579006 | 2.09E-06 | 0.0001078 | 4.6829951 |
|          | 42         | 1         | 13         |          | 29        | 28        |
| FGF13    | -1.7722686 | 7.8851623 | -5.1284687 | 2.35E-06 | 0.0001182 | 4.5738485 |

|         |            |           |            |          |           |           |
|---------|------------|-----------|------------|----------|-----------|-----------|
|         | 8          | 88        | 39         |          | 06        | 21        |
| ITIH3   | -2.2346908 | 7.7058323 | -5.0995232 | 2.63E-06 | 0.0001289 | 4.4667812 |
|         | 61         | 73        | 28         |          | 62        | 7         |
| RXFP1   | 2.3018898  | 5.8377536 | 5.0872095  | 2.75E-06 | 0.0001340 | 4.4213176 |
|         | 36         | 22        | 24         |          | 14        | 03        |
| TLR2    | 1.5936028  | 8.6052085 | 5.0796359  | 2.84E-06 | 0.0001358 | 4.3933800 |
|         | 1          | 3         | 28         |          | 42        | 05        |
| SCG5    | 1.5249822  | 7.0018367 | 5.0789429  | 2.84E-06 | 0.0001358 | 4.3908248 |
|         | 29         | 07        | 88         |          | 42        | 33        |
| ABRA    | -1.8395830 | 5.4264192 | -5.0414047 | 3.29E-06 | 0.0001523 | 4.2526456 |
|         | 57         | 22        | 14         |          | 09        | 15        |
| CPXM1   | 2.4477916  | 7.0531699 | 5.0411928  | 3.29E-06 | 0.0001523 | 4.2518670 |
|         | 5          | 79        | 53         |          | 09        | 99        |
| CCL26   | 1.9244838  | 7.1639168 | 5.0408473  | 3.30E-06 | 0.0001523 | 4.2505975 |
|         | 63         | 1         | 65         |          | 09        | 86        |
| MYOCD   | -1.7955382 | 8.9330782 | -5.0314928 | 3.42E-06 | 0.0001553 | 4.2162394 |
|         | 8          | 17        | 95         |          | 76        | 83        |
| IRX5    | -1.5180921 | 6.9452286 | -4.9728733 | 4.28E-06 | 0.0001874 | 4.0016195 |
|         | 17         | 15        | 51         |          | 05        | 7         |
| RFPL1S  | 1.7245162  | 5.3693945 | 4.9425796  | 4.81E-06 | 0.0002053 | 3.8911765 |
|         | 54         | 53        | 73         |          | 41        | 55        |
| RELN    | -1.7456178 | 7.3305602 | -4.8925565 | 5.83E-06 | 0.0002380 | 3.7095193 |
|         | 07         | 78        | 73         |          | 12        | 35        |
| ADAP2   | 1.7850159  | 9.0266073 | 4.8673003  | 6.42E-06 | 0.0002569 | 3.6181453 |
|         | 24         | 3         | 43         |          | 75        | 34        |
| PLVAP   | -1.6213647 | 7.4021426 | -4.8671900 | 6.42E-06 | 0.0002569 | 3.6177467 |
|         | 31         | 55        | 32         |          | 75        | 5         |
| RGS4    | 1.7023929  | 8.0110981 | 4.8429445  | 7.04E-06 | 0.0002762 | 3.5302503 |
|         | 15         | 16        | 92         |          | 18        | 57        |
| CD80    | 1.6412045  | 5.9332129 | 4.8053325  | 8.12E-06 | 0.0003050 | 3.3949479 |
|         | 66         | 54        | 18         |          | 95        | 58        |
| PGAM2   | -1.8974272 | 6.8858803 | -4.8024329 | 8.21E-06 | 0.0003064 | 3.3845394 |
|         | 71         | 35        | 92         |          | 89        | 25        |
| CCL4    | 1.9886034  | 8.3964575 | 4.8019727  | 8.22E-06 | 0.0003064 | 3.3828876 |
|         | 21         | 69        | 76         |          | 89        | 63        |
| SLC22A3 | -1.6257027 | 7.6727891 | -4.7936262 | 8.49E-06 | 0.0003145 | 3.3529447 |
|         | 12         | 08        | 05         |          | 11        | 95        |
| CXCL16  | 1.7311402  | 9.0302675 | 4.7627508  | 9.54E-06 | 0.0003455 | 3.2424104 |
|         | 66         | 87        | 19         |          | 68        | 56        |
| GRP     | 1.9575262  | 5.6063223 | 4.7621300  | 9.56E-06 | 0.0003455 | 3.2401918 |
|         | 4          | 59        | 49         |          | 68        | 15        |
| WRNIP1  | 1.6603765  | 7.1298152 | 4.7508638  | 9.97E-06 | 0.0003580 | 3.1999519 |
|         | 87         | 84        | 65         |          | 75        | 65        |
| CAV3    | -1.9105508 | 7.1023010 | -4.7484941 | 1.01E-05 | 0.0003604 | 3.1914940 |

|          |            |           |            |          |           |           |
|----------|------------|-----------|------------|----------|-----------|-----------|
|          | 13         | 11        | 21         |          | 57        | 67        |
| LMOD1    | -1.7643157 | 8.3310491 | -4.7063670 | 1.18E-05 | 0.0004065 | 3.0415003 |
|          | 06         | 61        | 98         |          | 57        | 36        |
| ZCCHC12  | 1.5703923  | 6.1275152 | 4.6665342  | 1.37E-05 | 0.0004636 | 2.9003139 |
|          | 31         | 14        | 67         |          | 53        | 98        |
| TTLL7    | -1.6469292 | 7.5017619 | -4.6429768 | 1.49E-05 | 0.0004994 | 2.8171117 |
|          | 33         | 48        | 22         |          | 19        | 29        |
| REEP1    | -1.6775306 | 7.7180946 | -4.6425883 | 1.50E-05 | 0.0004994 | 2.8157416 |
|          | 09         | 66        | 76         |          | 19        | 46        |
| ST14     | 1.8816960  | 6.0955470 | 4.6371497  | 1.53E-05 | 0.0005074 | 2.7965654 |
|          | 23         | 54        | 49         |          | 77        | 64        |
| IGFBPL1  | -1.8465188 | 6.3736227 | -4.6254216 | 1.60E-05 | 0.0005267 | 2.7552535 |
|          | 36         | 35        | 34         |          | 69        | 94        |
| PPP1R1A  | -2.0858599 | 6.9889978 | -4.6235298 | 1.61E-05 | 0.0005293 | 2.7485951 |
|          | 81         | 55        | 75         |          | 71        | 44        |
| FCER1G   | 1.8028656  | 7.9875272 | 4.6149975  | 1.66E-05 | 0.0005396 | 2.7185818 |
|          | 42         | 03        | 51         |          | 09        | 19        |
| CXCL1    | 1.6155630  | 7.3413626 | 4.6136870  | 1.67E-05 | 0.0005411 | 2.7139746 |
|          | 94         | 8         | 49         |          | 17        | 11        |
| ADAMTS   | 3.5092586  | 8.2138993 | 4.5711145  | 1.95E-05 | 0.0006157 | 2.5646882 |
| 10       | 73         | 39        | 7          |          | 56        | 29        |
| DLGAP5   | 1.9410592  | 4.9580536 | 4.5696427  | 1.96E-05 | 0.0006166 | 2.5595403 |
|          | 57         | 15        | 22         |          | 28        | 12        |
| SYNGR3   | 1.5731751  | 5.5962121 | 4.5393122  | 2.19E-05 | 0.0006751 | 2.4536569 |
|          | 48         | 73        | 34         |          | 9         | 01        |
| TUSC5    | -1.7316513 | 6.2877886 | -4.5333145 | 2.24E-05 | 0.0006858 | 2.4327644 |
|          | 97         | 46        | 44         |          | 5         | 69        |
| MSR1     | 1.5713057  | 6.6797687 | 4.5280576  | 2.29E-05 | 0.0006965 | 2.4144651 |
|          | 43         | 87        | 98         |          | 41        | 06        |
| C16orf89 | 1.7160714  | 7.4221741 | 4.5123288  | 2.42E-05 | 0.0007323 | 2.3597814 |
|          | 17         |           | 12         |          | 51        | 59        |
| CLEC7A   | 1.8941508  | 6.8623398 | 4.4987334  | 2.55E-05 | 0.0007669 | 2.3125996 |
|          | 17         | 67        | 8          |          | 08        | 65        |
| PLA2G7   | 1.7705598  | 6.5440155 | 4.4824591  | 2.71E-05 | 0.0008007 | 2.2562239 |
|          | 38         | 36        | 76         |          | 22        | 96        |
| WNT4     | 2.0632600  | 5.7592599 | 4.4347751  | 3.22E-05 | 0.0009145 | 2.0916968 |
|          | 86         | 38        | 06         |          | 56        | 24        |
| OLR1     | 2.4835125  | 8.3314667 | 4.4063452  | 3.57E-05 | 0.0009830 | 1.9940736 |
|          | 84         | 81        | 49         |          | 36        | 62        |
| CCR5     | 1.5884073  | 8.3080764 | 4.3848213  | 3.86E-05 | 0.0010472 | 1.9204006 |
|          | 4          | 65        | 11         |          | 58        | 62        |
| FABP4    | -1.8939955 | 7.4303458 | -4.3678411 | 4.11E-05 | 0.0010947 | 1.8624253 |
|          | 57         | 56        | 74         |          | 06        | 51        |
| CHRD1    | -2.1918508 | 8.1375767 | -4.3606959 | 4.21E-05 | 0.0011142 | 1.8380678 |

|              |            |           |            |           |           |           |
|--------------|------------|-----------|------------|-----------|-----------|-----------|
|              | 63         | 67        | 49         |           | 35        | 38        |
| ADAM12       | 1.7914252  | 6.8141816 | 4.3530596  | 4.33E-05  | 0.0011411 | 1.8120614 |
|              | 2          | 84        | 27         |           | 9         | 85        |
| NUP210       | 1.5433379  | 6.5763579 | 4.3248738  | 4.80E-05  | 0.0012405 | 1.7162988 |
|              | 3          | 12        | 32         |           | 08        | 51        |
| MS4A4A       | 1.5562675  | 7.7664012 | 4.3000398  | 5.24E-05  | 0.0013362 | 1.6322227 |
|              | 28         | 25        | 52         |           | 98        | 43        |
| PRSS35       | 1.5816583  | 8.4520316 | 4.2937049  | 5.37E-05  | 0.0013625 | 1.6108208 |
|              | 92         | 05        | 33         |           | 91        | 04        |
| BATF         | 1.6154683  | 7.7289781 | 4.2509576  | 6.25E-05  | 0.0015234 | 1.4668866 |
|              | 56         | 09        | 58         |           | 74        | 15        |
| APOBEC3<br>B | 1.5550293  | 6.1821046 | 4.2291418  | 6.76E-05  | 0.0016189 | 1.3937580 |
|              | 8          | 63        | 53         |           | 28        | 9         |
| CCL18        | 2.2489165  | 7.2356838 | 4.2058908  | 7.34E-05  | 0.0017165 | 1.3160648 |
|              | 64         | 36        | 75         |           | 22        | 67        |
| EYA2         | 1.5993906  | 7.8814513 | 4.1862001  | 7.87E-05  | 0.0018293 | 1.2504682 |
|              | 97         | 12        | 1          |           |           | 58        |
| LY86         | 2.0562135  | 9.9020668 | 4.1821814  | 7.98E-05  | 0.0018447 | 1.2371034 |
|              | 34         | 69        | 69         |           | 65        | 84        |
| PRAM1        | 1.5697643  | 6.2422930 | 4.1745932  | 8.20E-05  | 0.0018893 | 1.2118884 |
|              | 53         | 63        | 64         |           | 81        | 68        |
| MS4A7        | 1.5893656  | 7.6588226 | 4.1715976  | 8.29E-05  | 0.0019038 | 1.2019417 |
|              | 49         | 67        | 26         |           | 86        | 83        |
| ACP5         | 1.7236740  | 6.7061338 | 4.1257405  | 9.74E-05  | 0.0021616 | 1.0502180 |
|              | 4          | 02        | 25         |           | 55        | 25        |
| ADAMDE<br>C1 | 1.7184297  | 6.5815089 | 4.1017164  | 0.0001060 | 0.0023059 | 0.9711393 |
|              | 43         | 68        | 53         | 04        | 65        | 65        |
| CUZD1        | 3.1637482  | 7.9750930 | 4.0995608  | 0.0001068 | 0.0023202 | 0.9640576 |
|              | 2          | 15        | 27         | 08        | 16        | 41        |
| MYH11        | -1.6182281 | 8.4760162 | -4.0852138 | 0.0001123 | 0.0024195 | 0.9169828 |
|              | 29         | 52        | 65         | 08        | 08        | 6         |
| SERPIND<br>1 | 1.7587538  | 5.1214592 | 4.0835003  | 0.0001129 | 0.0024306 | 0.9113674 |
|              | 64         | 9         | 92         | 83        | 94        | 56        |
| TBCEL        | 1.5150232  | 8.0265753 | 4.0747003  | 0.0001165 | 0.0024894 | 0.8825506 |
|              | 9          | 15        | 12         | 11        | 46        | 69        |
| C18orf21     | 2.0355456  | 7.3900826 | 4.0673193  | 0.0001195 | 0.0025370 | 0.8584105 |
|              | 56         | 26        | 44         | 51        | 57        | 19        |
| CD86         | 1.5052008  | 8.1774918 | 4.0417432  | 0.0001306 | 0.0027144 | 0.7749715 |
|              | 18         | 62        | 98         | 89        | 01        | 68        |
| CFD          | -2.3954703 | 8.5898810 | -3.9891074 | 0.0001568 | 0.0031164 | 0.6042882 |
|              | 36         | 43        | 21         | 32        | 94        | 49        |
| TGFBRAP<br>1 | 1.8973745  | 8.7799702 | 3.9874409  | 0.0001577 | 0.0031186 | 0.5989073 |
|              | 27         | 53        | 75         | 37        | 02        | 94        |
| VSIG4        | 1.6095504  | 8.6665015 | 3.9650389  | 0.0001703 | 0.0033086 | 0.5267104 |

|         |            |           |            |           |           |            |
|---------|------------|-----------|------------|-----------|-----------|------------|
|         | 11         | 31        | 12         | 97        | 91        | 9          |
| MFAP4   | -1.5882221 | 8.7302714 | -3.9484061 | 0.0001804 | 0.0034492 | 0.4732737  |
|         | 12         | 37        | 82         | 21        | 06        | 87         |
| GPM6B   | -1.7526644 | 8.0218117 | -3.9017641 | 0.0002116 | 0.0039073 | 0.3241906  |
|         | 49         | 79        |            | 41        | 62        | 93         |
| APBA2   | 1.5116760  | 7.4215054 | 3.8999747  | 0.0002129 | 0.0039266 | 0.3184940  |
|         | 26         | 22        | 77         | 37        | 36        | 93         |
| HPSE2   | -1.6392343 | 5.1989994 | -3.8934234 | 0.0002177 | 0.0039964 | 0.2976511  |
|         | 69         | 97        | 05         | 45        | 22        | 1          |
| EFR3B   | 1.6986901  | 6.8800812 | 3.8718969  | 0.0002342 | 0.0042061 | 0.2293248  |
|         | 54         | 34        | 56         | 86        | 95        | 52         |
| CD180   | 2.3152685  | 8.0940370 | 3.8613841  | 0.0002427 | 0.0043214 | 0.1960457  |
|         | 15         | 92        | 24         | 95        | 48        | 2          |
| C1QB    | 1.8891200  | 8.0964718 | 3.8489425  | 0.0002532 | 0.0044897 | 0.1567369  |
|         | 44         | 06        | 28         | 47        | 52        | 72         |
| TPO     | -1.7105391 | 4.9116136 | -3.8410408 | 0.0002601 | 0.0045750 | 0.1318149  |
|         | 63         | 18        | 93         | 08        | 31        | 91         |
| DDAH1   | 1.7050586  | 8.0343887 | 3.8277443  | 0.0002720 | 0.0047056 | 0.0899528  |
|         | 86         | 5         | 46         | 56        | 97        | 58         |
| IGHM    | 1.7744715  | 6.5797310 | 3.8232950  | 0.0002761 | 0.0047610 | 0.0759660  |
|         | 75         | 49        | 29         | 7         | 39        | 91         |
| ANXA13  | 1.5453063  | 6.0218879 | 3.7825454  | 0.0003167 | 0.0053020 | -0.0516350 |
|         | 67         | 97        | 71         | 2         | 96        | 75         |
| PSTPIP1 | 1.9235091  | 7.3261309 | 3.7757014  | 0.0003240 | 0.0054019 | -0.0729776 |
|         | 4          | 63        | 15         | 66        | 11        | 28         |
| MELK    | 1.5258137  | 6.9892220 | 3.7554360  | 0.0003467 | 0.0056121 | -0.1360228 |
|         | 43         | 59        | 4          | 84        | 84        | 24         |
| PLP1    | -1.5791308 | 7.4688785 | -3.7552618 | 0.0003469 | 0.0056121 | -0.1365636 |
|         | 36         | 41        | 82         | 86        | 84        | 5          |
| TNNC1   | -2.2367895 | 6.8444828 | -3.7461559 | 0.0003576 | 0.0057182 | -0.1648176 |
|         | 92         | 95        | 47         | 88        | 51        | 25         |
| ZNF461  | 2.2654521  | 6.5184617 | 3.7361277  | 0.0003698 | 0.0058525 | -0.1958801 |
|         | 77         | 13        | 61         | 38        | 76        | 9          |
| KLRC3   | 1.5919787  | 4.7210265 | 3.7277530  | 0.0003802 | 0.0059584 | -0.2217784 |
|         | 9          | 64        | 28         | 85        | 75        | 65         |
| HTRA4   | 3.2420397  | 8.6734294 | 3.7005413  | 0.0004162 | 0.0063350 | -0.3056593 |
|         | 09         | 81        | 13         | 1         | 69        | 61         |
| GALNT5  | 1.8437564  | 7.1948611 | 3.6844352  | 0.0004389 | 0.0065673 | -0.3551115 |
|         | 64         | 98        | 79         | 73        | 62        | 28         |
| ALX3    | 1.7981298  | 6.8623414 | 3.6604990  | 0.0004750 | 0.0070051 | -0.4283355 |
|         | 25         | 62        | 75         | 07        | 86        | 94         |
| CECR6   | 3.0539875  | 6.6312360 | 3.6431379  | 0.0005028 | 0.0073475 | -0.4812425 |
|         | 28         | 65        | 15         | 85        | 85        | 9          |
| HP      | -1.7120432 | 7.0741677 | -3.6411507 | 0.0005061 | 0.0073749 | -0.4872874 |

|          |            |           |            |           |           |            |
|----------|------------|-----------|------------|-----------|-----------|------------|
|          | 04         | 5         | 19         | 74        | 38        | 99         |
| LILRB4   | 2.0381960  | 6.7837299 | 3.6239326  | 0.0005355 | 0.0077021 | -0.5395693 |
|          | 7          | 24        | 06         | 38        | 76        | 27         |
| C1QC     | 1.5131629  | 8.1364095 | 3.6031735  | 0.0005730 | 0.0081226 | -0.6023770 |
|          | 42         | 25        | 08         | 95        | 65        | 75         |
| SLA      | 1.5851763  | 9.6221790 | 3.5668971  | 0.0006448 | 0.0089156 | -0.7115353 |
|          | 31         | 6         | 43         | 08        | 79        | 65         |
| ARSE     | 1.5205551  | 7.1799366 | 3.5529253  | 0.0006746 | 0.0092350 | -0.7533733 |
|          | 29         | 49        | 18         | 37        | 18        | 57         |
| CEP55    | 1.7473634  | 6.3940268 | 3.5511771  | 0.0006784 | 0.0092792 | -0.7586002 |
|          | 05         | 12        | 2          | 6         | 21        | 19         |
| CNN1     | -2.0670231 | 9.1009801 | -3.5073564 | 0.0007812 | 0.0103152 | -0.8890302 |
|          | 08         | 45        | 64         | 85        | 07        | 49         |
| MARCO    | 2.7282257  | 8.1325754 | 3.5049947  | 0.0007872 | 0.0103673 | -0.8960276 |
|          | 17         | 02        | 06         | 26        | 61        | 66         |
| SLC16A10 | 1.8034291  | 6.6076148 | 3.4867744  | 0.0008345 | 0.0108688 | -0.9498991 |
|          | 9          | 51        | 38         | 24        | 72        | 47         |
| KIF20A   | 1.6168463  | 5.6258461 | 3.4730387  | 0.0008719 | 0.0112553 | -0.9903800 |
|          | 79         | 48        | 92         | 45        |           | 55         |
| HK3      | 1.7138099  | 6.1616013 | 3.4540718  | 0.0009262 | 0.0117721 | -1.0460922 |
|          | 82         | 21        | 61         | 36        | 72        | 84         |
| PCDH8    | -2.2453892 | 6.1207893 | -3.4406520 | 0.0009665 | 0.0121551 | -1.0853799 |
|          | 54         | 76        | 11         | 63        | 87        | 59         |
| CLEC16A  | 1.7255884  | 6.8328604 | 3.4298830  | 0.0010001 | 0.0124667 | -1.1168280 |
|          | 87         | 12        | 8          | 18        | 56        | 66         |
| GREM1    | 1.7546917  | 5.8165747 | 3.4209765  | 0.0010286 | 0.0127114 | -1.1427843 |
|          | 86         | 54        | 41         | 99        | 32        | 26         |
| FCGR1B   | 2.5121017  | 9.8553647 | 3.3315152  | 0.0013618 | 0.0156060 | -1.4008026 |
|          | 83         | 72        | 7          | 74        | 94        | 78         |
| CD163    | 1.5770770  | 7.6783138 | 3.2955907  | 0.0015223 | 0.0170571 | -1.5030155 |
|          | 56         | 06        | 01         | 53        | 2         | 4          |
| TMEM132  | 2.1735250  | 8.3136378 | 3.2905441  | 0.0015462 | 0.0172879 | -1.5173089 |
| C        |            | 65        | 52         | 81        | 71        | 08         |
| PLN      | -1.9611427 | 8.7086564 | -3.2180747 | 0.0019311 | 0.0204627 | -1.7207830 |
|          | 82         | 38        | 69         | 14        | 3         | 91         |
| TEX264   | 1.6031770  | 8.8571520 | 3.2076721  | 0.0019932 | 0.0210220 | -1.7497148 |
|          | 08         | 34        | 8          | 17        | 7         | 18         |
| CCL20    | 2.4014649  | 6.5423960 | 3.1915498  | 0.0020931 | 0.0217369 | -1.7944163 |
|          | 17         | 5         | 09         | 75        | 46        | 64         |
| TBL1X    | -1.6713831 | 8.4268453 | -3.1808211 | 0.0021622 | 0.0222187 | -1.8240697 |
|          | 14         | 58        | 74         | 72        | 65        | 04         |
| SIGLEC9  | 1.8342657  | 5.8442846 | 3.1770158  | 0.0021872 | 0.0224168 | -1.8345693 |
|          | 46         | 84        | 88         | 88        | 32        | 38         |
| EBI3     | 1.7548763  | 7.0255511 | 3.1564976  | 0.0023269 | 0.0235236 | -1.8910212 |



|          |            |           |            |           |           |            |
|----------|------------|-----------|------------|-----------|-----------|------------|
|          | 42         | 83        | 11         | 08        | 06        | 35         |
| GPR83    | 1.6658207  | 6.5618652 | 3.1405300  | 0.0024412 | 0.0244582 | -1.9347623 |
|          | 64         | 02        | 1          | 79        | 05        | 87         |
| NOV      | -1.9645314 | 8.8194676 | -3.1300368 | 0.0025192 | 0.0250787 | -1.9634157 |
|          | 22         | 84        | 78         | 75        | 52        | 94         |
| BEND6    | 1.5591276  | 6.4679670 | 3.1279636  | 0.0025349 | 0.0251680 | -1.9690686 |
|          | 31         | 58        | 04         | 59        | 57        | 71         |
| SIT1     | 1.6149227  | 6.5530929 | 3.1097243  | 0.0026769 | 0.0261807 | -2.0186766 |
|          | 88         | 87        | 27         | 12        | 72        | 43         |
| MAR      | 1.6827306  | 6.1974426 | 3.1015774  | 0.0027426 | 0.0267403 | -2.0407637 |
|          | 2          |           | 65         | 84        | 16        | 22         |
| MCAM     | -1.6100926 | 10.576073 | -3.0969206 | 0.0027809 | 0.0270290 | -2.0533691 |
|          | 27         | 38        | 51         | 54        | 72        |            |
| ZNF280B  | 1.7309075  | 6.4440959 | 3.0844889  | 0.0028855 | 0.0278161 | -2.0869494 |
|          | 96         | 37        | 47         | 69        | 08        | 6          |
| OR52K3P  | 1.8728226  | 6.3144142 | 3.0843378  | 0.0028868 | 0.0278161 | -2.0873569 |
|          | 66         | 69        | 7          | 63        | 08        | 15         |
| PCDH11X  | 2.3367173  | 6.6411364 | 3.0777171  | 0.0029440 | 0.0282976 | -2.1051981 |
|          | 67         | 04        | 16         | 87        | 58        | 28         |
| IGLV6-57 | 2.3257431  | 5.8253397 | 3.0752039  | 0.0029660 | 0.0284216 | -2.1119629 |
|          | 01         | 84        |            | 84        | 4         | 32         |
| ASB2     | -2.2904590 | 7.8175712 | -3.0650202 | 0.0030567 | 0.0291400 | -2.1393308 |
|          | 38         | 87        | 79         | 95        | 59        | 87         |
| HOXA11   | 1.5345889  | 4.9854450 | 3.0230645  | 0.0034584 | 0.0319817 | -2.2513500 |
|          | 81         | 5         | 87         | 27        | 48        | 25         |
| FNDC1    | 1.9084830  | 9.6040347 | 3.0143771  | 0.0035474 | 0.0325166 | -2.2743965 |
|          | 9          | 54        | 02         | 94        | 15        | 72         |
| FAM110A  | 1.6240503  | 7.6230408 | 2.9805656  | 0.0039148 | 0.0349202 | -2.3636045 |
|          | 57         | 68        | 91         | 05        | 37        | 2          |
| DIXDC1   | 1.9863871  | 9.7980191 | 2.9344615  | 0.0044726 | 0.0389614 | -2.4839839 |
|          | 57         | 18        | 04         | 25        | 75        | 91         |
| CLEC4C   | 1.5360289  | 5.2590407 | 2.9130952  | 0.0047553 | 0.0407870 | -2.5392742 |
|          | 03         | 56        |            | 13        | 63        | 96         |
| SPC25    | 1.6428474  | 5.5080473 | 2.8992798  | 0.0049467 | 0.0421056 | -2.5748556 |
|          | 35         | 05        | 91         | 9         | 77        | 92         |
| SOX11    | 1.9786159  | 6.3939219 | 2.8944453  | 0.0050154 | 0.0423898 | -2.5872755 |
|          | 92         | 24        | 95         | 59        | 58        | 22         |
| FAM181A  | 2.1883668  | 7.7072690 | 2.8849587  | 0.0051527 | 0.0431426 | -2.6115992 |
|          | 39         | 04        | 51         | 71        | 31        | 45         |
| KIF21B   | 1.8224338  | 7.1891264 | 2.8695855  | 0.0053826 | 0.0446241 | -2.6508820 |
|          | 35         | 9         | 99         | 65        | 25        | 67         |
| SULT1E1  | 2.1724495  | 6.5774345 | 2.8640673  | 0.0054674 | 0.0451116 | -2.6649421 |
|          | 08         | 36        | 87         | 66        | 51        | 98         |
| TLR1     | 1.5591834  | 8.6410815 | 2.8536431  | 0.0056310 | 0.0460959 | -2.6914442 |

|        |            |           |            |           |           |            |
|--------|------------|-----------|------------|-----------|-----------|------------|
|        | 82         | 22        | 01         | 29        | 32        | 6          |
| AOC3   | -1.6385845 | 11.352478 | -2.8423197 | 0.0058137 | 0.0471170 | -2.7201452 |
|        | 14         | 76        | 07         | 96        | 34        | 74         |
| B3GAT2 | 1.6997371  | 5.8289987 | 2.8297315  | 0.0060233 | 0.0484693 | -2.7519456 |
|        | 67         | 78        | 15         | 74        | 87        | 42         |
| LAMC3  | 1.7924775  | 7.4738565 | 2.8187309  | 0.0062121 | 0.0495800 | -2.7796431 |
|        | 71         | 46        | 89         | 85        | 29        | 83         |

**Table S2\_DEG\_GO\_KEGG**

**Enrichment analysis of GO among all DEGs**

| ID        | description           | size | enrichment ratio | p value  | FD       | geneID                                                                                                                                                                                                                                                                                                                                       |
|-----------|-----------------------|------|------------------|----------|----------|----------------------------------------------------------------------------------------------------------------------------------------------------------------------------------------------------------------------------------------------------------------------------------------------------------------------------------------------|
| GO:006954 | inflammatory response | 717  | 3.66             | 1.24E-11 | 1.12E-07 | P2RX1;AGTR1;ADIPOQ;ADORA2B;CCL21;ADORA3;NPY5R;SCG2;FPR3;HMOX1;TAC1;SPP1;SIGLEC10;SLAMF8;TLR2;CCL26;FCER1G;CXCL1;CLEC7A;PLA2G7;OLR1;CCR5;FABP4;CCL18;LY86;ACP5;CD180;C1QB;PSTPIP1;PLP1;HP;C1QC;CD163;CCL20;TLR1;AOC3                                                                                                                          |
| GO:006952 | defense response      | 1518 | 2.45             | 1.15E-09 | 5.21E-06 | TREM2;P2RX1;AGTR1;ADIPOQ;ADORA2B;CCL21;ADORA3;NPY5R;RNASE2;CD300LF;CLEC5A;SCG2;FPR3;HMOX1;TAC1;SPP1;LILRB1;SIGLEC10;SLAMF8;TLR2;CCL26;CXCL16;WRNIP1;FCER1G;CXCL1;CLEC7A;PLA2G7;OLR1;CCR5;FABP4;BATF;APOBEC3B;CCL18;LY86;ACP5;CFD;VSIG4;CD180;C1QB;PSTPIP1;PLP1;KLRC3;HP;C1QC;MARCO;FCGR1B;CD163;CCL20;CLEC4C;TLR1;AOC3                       |
| GO:006955 | immune response       | 1915 | 2.09             | 6.15E-08 | 1.86E-04 | TREM2;P2RX1;ITLN1;ADORA2B;CCL21;GAPT;BIN2;NPY5R;RNASE2;LAIR1;DSP;CD300LF;CLEC5A;RGS1;FPR3;HMOX1;CXCL14;LILRB1;SIGLEC10;SVIP;SLAMF8;TLR2;CCL26;CD80;CXCL16;WRNIP1;FCER1G;CXCL1;CLEC7A;OLR1;CCR5;BATF;APOBEC3B;CCL18;LY86;PRAM1;ADAMDEC1;CD86;CFD;VSIG4;CD180;C1QB;PSTPIP1;HP;LILRB4;C1QC;MARCO;HK3;FCGR1B;CCL20;SIGLEC9;EBI3;SIT1;CLEC4C;TLR1 |
| GO:006930 | muscle system process | 423  | 3.80             | 8.85E-04 | 2.01E-04 | MYOT;SLMAP;P2RX1;ACTA1;RYSR2;MYOC;ADORA2B;MYOM1;CASQ2;DSP;KCNA5;OXTR;HMOX1;MYOCD;RGS4;PGAM2;CAV3;LMOD1;MYH11;TNNC1;CNN1;PLN                                                                                                                                                                                                                  |

|     |              |   |   |      |    |     |                                                                                |
|-----|--------------|---|---|------|----|-----|--------------------------------------------------------------------------------|
| 12  |              |   |   |      | 08 |     |                                                                                |
| GO  |              |   |   |      | 2. |     |                                                                                |
| :00 | muscle       | 3 | 1 | 4.09 | 23 | 3.7 | MYOT;SLMAP;P2RX1;ACTA1;RYR2;ADORA2B;MYOM1;CASQ2;DSP;KCNA5;OXTR;MYOCD;PGA       |
| 069 | contraction  | 3 | 9 | 6361 | E- | 0E- | M2;CAV3;LMOD1;MYH11;TNNC1;CNN1;PLN                                             |
| 36  |              | 9 |   | 849  | 07 | 04  |                                                                                |
| GO  |              |   |   |      | 2. |     |                                                                                |
| :00 | actomyosin   | 1 | 1 | 5.56 | 44 | 3.7 | ACTA1;MYOC;MYOM1;CASQ2;WNT11;FHOD3;PPP1R9A;LDB3;TAC1;CAV3;LMOD1;WNT4;MYH       |
| 310 | structure    | 8 | 4 | 1022 | E- | 0E- | 11;CNN1                                                                        |
| 32  | organization | 4 |   | 121  | 07 | 04  |                                                                                |
| GO  | striated     |   |   |      | 4. |     |                                                                                |
| :00 | muscle       | 3 | 1 | 3.88 | 92 | 6.3 | COL11A1;ACTA1;RYR2;MYOM1;SHOX2;KCNAB1;DSP;FHOD3;EYA1;MYOCD;RGS4;CAV3;EYA2;     |
| 147 | tissue       | 5 | 9 | 9822 | E- | 9E- | MYH11;TNNC1;GREM1;PLN;ASB2;SOX11                                               |
| 06  | developmen   | 7 |   | 596  | 07 | 04  |                                                                                |
|     | t            |   |   |      |    |     |                                                                                |
| GO  |              | 1 |   |      | 7. |     |                                                                                |
| :00 | leukocyte    | 1 | 3 | 2.34 | 02 | 7.9 | P2RX1;IL21R;ADORA2B;CCL21;GAPT;BIN2;RNASE2;LAIR1;DSP;CD300LF;CLEC5A;HMOX1;TAC  |
| 453 | activation   | 8 | 8 | 5720 | E- | 8E- | 1;LILRB1;SVIP;SLAMF8;TLR2;CD80;FCER1G;CXCL1;CLEC7A;WNT4;OLR1;BATF;PRAM1;CD86;C |
| 21  |              | 4 |   | 721  | 07 | 04  | FD;VSIG4;CD180;HP;LILRB4;HK3;SIGLEC9;EBI3;SIT1;CLEC4C;SOX11;TLR1               |
| GO  | muscle       |   |   |      | 8. |     |                                                                                |
| :00 | tissue       | 3 | 1 | 3.74 | 80 | 8.8 | COL11A1;ACTA1;RYR2;MYOM1;SHOX2;KCNAB1;DSP;FHOD3;EYA1;MYOCD;RGS4;CAV3;EYA2;     |
| 605 | developmen   | 7 | 9 | 3036 | E- | 8E- | MYH11;TNNC1;GREM1;PLN;ASB2;SOX11                                               |
| 37  | t            | 1 |   | 837  | 07 | 04  |                                                                                |
| GO  | regulation   |   |   |      | 1. |     |                                                                                |
| :00 | of muscle    | 1 | 1 | 5.80 | 13 | 0.0 |                                                                                |
| 069 | contraction  | 5 | 2 | 8295 | E- | 299 | P2RX1;RYR2;ADORA2B;CASQ2;DSP;OXTR;FGF13;MYOCD;CAV3;TNNC1;CNN1;PLN              |
| 37  |              | 1 |   | 573  | 06 | 78  |                                                                                |

| ID               | description                                       | si-<br>z-<br>e | o-<br>v-<br>er-<br>la-<br>p | enric<br>hme<br>ntRa<br>tio | p<br>V<br>al<br>ue   | FD<br>R          | geneID                                                       |
|------------------|---------------------------------------------------|----------------|-----------------------------|-----------------------------|----------------------|------------------|--------------------------------------------------------------|
| hsa<br>040<br>62 | Chemokine<br>signaling<br>pathway                 | 1<br>8<br>9    |                             | 3.76<br>E+0<br>0            | 6.<br>05<br>E-<br>04 | 1.5<br>1E-<br>01 | CCL21;CXCL14;CCL26;CCL4;CXCL16;CXCL1;CCR5;CCL18;CCL20        |
| hsa<br>053<br>23 | Rheumatoid<br>arthritis                           | 9<br>0         | 6                           | 5.27<br>E+0<br>0            | 9.<br>24<br>E-<br>04 | 1.5<br>1E-<br>01 | TLR2;CD80;CXCL1;ACP5;CD86;CCL20                              |
| hsa<br>002<br>60 | Glycine,<br>serine and<br>threonine<br>metabolism | 4<br>0         | 4                           | 7.90<br>E+0<br>0            | 1.<br>55<br>E-<br>03 | 1.5<br>6E-<br>01 | SDSL;MAOA;PGAM2;AOC3                                         |
| hsa<br>046<br>20 | Toll-like<br>receptor<br>signaling<br>pathway     | 1<br>0<br>4    | 6                           | 4.56<br>E+0<br>0            | 1.<br>96<br>E-<br>03 | 1.5<br>6E-<br>01 | SPP1;TLR2;CD80;CCL4;CD86;TLR1                                |
| hsa<br>040<br>80 | Neuroactive<br>ligand-recep<br>tor                | 2<br>7<br>7    | 1<br>0                      | 2.85<br>E+0<br>0            | 2.<br>50<br>E-       | 1.5<br>6E-<br>01 | P2RX1;NPY1R;AGTR1;ADORA2B;ADORA3;NPY5R;FPR3;OXTR;RXFP1;GPR83 |

|     |                       |   |   |      |    |     |                                                             |
|-----|-----------------------|---|---|------|----|-----|-------------------------------------------------------------|
|     | interaction           |   |   |      | 03 |     |                                                             |
| hsa | Complement and        | 7 |   | 5.00 | 3. | 1.5 |                                                             |
| 046 | coagulation           | 9 | 5 | E+0  | 14 | 6E- | SERPIND1;CFD;VSIG4;C1QB;C1QC                                |
| 10  | cascades              |   |   | 0    | E- | 01  |                                                             |
|     |                       |   |   |      | 03 |     |                                                             |
| hsa | ECM-receptor          | 8 |   | 4.82 | 3. | 1.5 |                                                             |
| 045 | interaction           | 2 | 5 | E+0  | 69 | 6E- | TNC;IBSP;SPP1;RELN;LAMC3                                    |
| 12  |                       |   |   | 0    | E- | 01  |                                                             |
|     |                       |   |   |      | 03 |     |                                                             |
| hsa | Cytokine-cytokine     | 2 |   | 2.69 | 3. | 1.5 |                                                             |
| 040 | receptor              | 9 | 1 | E+0  | 84 | 6E- | IL21R;CCL21;CXCL14;CCL26;CCL4;CXCL16;CXCL1;CCR5;CCL18;CCL20 |
| 60  | interaction           | 4 | 0 | 0    | E- | 01  |                                                             |
|     |                       |   |   |      | 03 |     |                                                             |
| hsa | Staphylococcus aureus | 5 |   | 5.65 | 5. | 1.9 |                                                             |
| 051 | infection             | 6 | 4 | E+0  | 34 | 3E- | FPR3;CFD;C1QB;C1QC                                          |
| 50  |                       |   |   | 0    | E- | 01  |                                                             |
|     |                       |   |   |      | 03 |     |                                                             |
| hsa | Calcium signaling     | 1 |   | 3.02 | 8. | 2.6 |                                                             |
| 040 | pathway               | 8 | 7 | E+0  | 27 | 9E- | P2RX1;RYSR2;AGTR1;ADORA2B;OXTR;TNNC1;PLN                    |
| 20  |                       | 3 |   | 0    | E- | 01  |                                                             |
|     |                       |   |   |      | 03 |     |                                                             |

**Table S3\_PCA\_ALL\_DEG****Summary of 2D-PCA among all genes**

|      | Standard deviation | Proportion of Variance | Cumulative Proportion |
|------|--------------------|------------------------|-----------------------|
| PC1  | 90.20086722        | 0.52105                | 0.52105               |
| PC2  | 34.59916963        | 0.07666                | 0.59771               |
| PC3  | 26.95180159        | 0.04652                | 0.64423               |
| PC4  | 23.17615722        | 0.0344                 | 0.67863               |
| PC5  | 19.72098951        | 0.02491                | 0.70354               |
| PC6  | 19.49477091        | 0.02434                | 0.72788               |
| PC7  | 17.54822113        | 0.01972                | 0.7476                |
| PC8  | 16.58916363        | 0.01762                | 0.76522               |
| PC9  | 14.38810075        | 0.01326                | 0.77848               |
| PC10 | 13.46883201        | 0.01162                | 0.7901                |
| PC11 | 12.84054621        | 0.01056                | 0.80066               |
| PC12 | 12.49660263        | 0.01                   | 0.81066               |
| PC13 | 11.45766504        | 0.00841                | 0.81906               |
| PC14 | 11.15580266        | 0.00797                | 0.82703               |
| PC15 | 10.91692103        | 0.00763                | 0.83467               |
| PC16 | 10.09219507        | 0.00652                | 0.84119               |
| PC17 | 10.0010128         | 0.00641                | 0.84759               |
| PC18 | 9.559103485        | 0.00585                | 0.85345               |
| PC19 | 9.251635341        | 0.00548                | 0.85893               |
| PC20 | 9.170918501        | 0.00539                | 0.86431               |

**Summary of 2D-PCA among DEGs**

|      | Standard deviation | Proportion of Variance | Cumulative Proportion |
|------|--------------------|------------------------|-----------------------|
| PC1  | 10.92965591        | 0.44909                | 0.44909               |
| PC2  | 7.328802611        | 0.20192                | 0.65101               |
| PC3  | 4.372269231        | 0.07187                | 0.72288               |
| PC4  | 3.031194647        | 0.03454                | 0.75742               |
| PC5  | 2.947527168        | 0.03266                | 0.79008               |
| PC6  | 2.230224451        | 0.0187                 | 0.80878               |
| PC7  | 2.070448026        | 0.01612                | 0.8249                |
| PC8  | 1.890886075        | 0.01344                | 0.83834               |
| PC9  | 1.813699811        | 0.01237                | 0.8507                |
| PC10 | 1.678483489        | 0.01059                | 0.86129               |
| PC11 | 1.602157575        | 0.00965                | 0.87094               |
| PC12 | 1.47576011         | 0.00819                | 0.87913               |
| PC13 | 1.370994019        | 0.00707                | 0.8862                |
| PC14 | 1.310208123        | 0.00645                | 0.89265               |
| PC15 | 1.234998983        | 0.00573                | 0.89839               |
| PC16 | 1.171494374        | 0.00516                | 0.90355               |
| PC17 | 1.149532506        | 0.00497                | 0.90851               |
| PC18 | 1.118257201        | 0.0047                 | 0.91321               |
| PC19 | 1.104306888        | 0.00458                | 0.9178                |
| PC20 | 1.079743515        | 0.00438                | 0.92218               |

|      |             |         |         |      |             |         |         |
|------|-------------|---------|---------|------|-------------|---------|---------|
| PC21 | 8.925024472 | 0.0051  | 0.86942 | PC21 | 1.036293054 | 0.00404 | 0.92622 |
| PC22 | 8.674607795 | 0.00482 | 0.87423 | PC22 | 0.994039518 | 0.00371 | 0.92993 |
| PC23 | 8.655812489 | 0.0048  | 0.87903 | PC23 | 0.990831409 | 0.00369 | 0.93362 |
| PC24 | 8.579844195 | 0.00471 | 0.88375 | PC24 | 0.98437143  | 0.00364 | 0.93727 |
| PC25 | 8.478967909 | 0.0046  | 0.88835 | PC25 | 0.966399312 | 0.00351 | 0.94078 |
| PC26 | 8.266569144 | 0.00438 | 0.89273 | PC26 | 0.932054186 | 0.00327 | 0.94404 |
| PC27 | 8.178321148 | 0.00428 | 0.89701 | PC27 | 0.910924566 | 0.00312 | 0.94716 |
| PC28 | 8.075284835 | 0.00418 | 0.90119 | PC28 | 0.885875491 | 0.00295 | 0.95011 |
| PC29 | 8.031326983 | 0.00413 | 0.90532 | PC29 | 0.876291312 | 0.00289 | 0.953   |
| PC30 | 7.921436494 | 0.00402 | 0.90934 | PC30 | 0.829573202 | 0.00259 | 0.95559 |
| PC31 | 7.840072626 | 0.00394 | 0.91327 | PC31 | 0.804853634 | 0.00244 | 0.95802 |
| PC32 | 7.828614792 | 0.00392 | 0.9172  | PC32 | 0.802287174 | 0.00242 | 0.96044 |
| PC33 | 7.644714005 | 0.00374 | 0.92094 | PC33 | 0.783863347 | 0.00231 | 0.96275 |
| PC34 | 7.588711475 | 0.00369 | 0.92463 | PC34 | 0.776367159 | 0.00227 | 0.96502 |
| PC35 | 7.560178559 | 0.00366 | 0.92829 | PC35 | 0.758027581 | 0.00216 | 0.96718 |
| PC36 | 7.494497919 | 0.0036  | 0.93189 | PC36 | 0.751754313 | 0.00212 | 0.9693  |
| PC37 | 7.488384395 | 0.00359 | 0.93548 | PC37 | 0.735672675 | 0.00203 | 0.97134 |
| PC38 | 7.33525147  | 0.00345 | 0.93892 | PC38 | 0.725181825 | 0.00198 | 0.97332 |
| PC39 | 7.247422563 | 0.00336 | 0.94229 | PC39 | 0.709800438 | 0.00189 | 0.97521 |
| PC40 | 7.167196397 | 0.00329 | 0.94558 | PC40 | 0.694964315 | 0.00182 | 0.97703 |
| PC41 | 7.14307014  | 0.00327 | 0.94884 | PC41 | 0.679372952 | 0.00174 | 0.97876 |
| PC42 | 7.085311119 | 0.00321 | 0.95206 | PC42 | 0.649556796 | 0.00159 | 0.98035 |
| PC43 | 6.97708474  | 0.00312 | 0.95518 | PC43 | 0.648254434 | 0.00158 | 0.98193 |
| PC44 | 6.921654358 | 0.00307 | 0.95824 | PC44 | 0.640640377 | 0.00154 | 0.98347 |
| PC45 | 6.899226304 | 0.00305 | 0.96129 | PC45 | 0.627095172 | 0.00148 | 0.98495 |
| PC46 | 6.837016126 | 0.00299 | 0.96429 | PC46 | 0.619071053 | 0.00144 | 0.98639 |



|      |             |         |         |      |             |         |         |
|------|-------------|---------|---------|------|-------------|---------|---------|
| PC47 | 6.753999015 | 0.00292 | 0.96721 | PC47 | 0.600137073 | 0.00135 | 0.98774 |
| PC48 | 6.590720246 | 0.00278 | 0.96999 | PC48 | 0.572495608 | 0.00123 | 0.98897 |
| PC49 | 6.539528629 | 0.00274 | 0.97273 | PC49 | 0.559905283 | 0.00118 | 0.99015 |
| PC50 | 6.462516489 | 0.00267 | 0.9754  | PC50 | 0.540686846 | 0.0011  | 0.99125 |
| PC51 | 6.342449687 | 0.00258 | 0.97798 | PC51 | 0.529964841 | 0.00106 | 0.99231 |
| PC52 | 6.201162871 | 0.00246 | 0.98044 | PC52 | 0.503367294 | 0.00095 | 0.99326 |
| PC53 | 6.142557625 | 0.00242 | 0.98286 | PC53 | 0.479375297 | 0.00086 | 0.99412 |
| PC54 | 5.899163724 | 0.00223 | 0.98509 | PC54 | 0.46206845  | 0.0008  | 0.99493 |
| PC55 | 5.39131343  | 0.00186 | 0.98695 | PC55 | 0.448041315 | 0.00075 | 0.99568 |
| PC56 | 5.179751619 | 0.00172 | 0.98867 | PC56 | 0.425389827 | 0.00068 | 0.99636 |
| PC57 | 4.770038234 | 0.00146 | 0.99012 | PC57 | 0.392322889 | 0.00058 | 0.99694 |
| PC58 | 4.591266199 | 0.00135 | 0.99147 | PC58 | 0.352474684 | 0.00047 | 0.99741 |
| PC59 | 4.209482378 | 0.00113 | 0.99261 | PC59 | 0.338740529 | 0.00043 | 0.99784 |
| PC60 | 4.067125272 | 0.00106 | 0.99367 | PC60 | 0.315560473 | 0.00037 | 0.99821 |
| PC61 | 3.748979726 | 0.0009  | 0.99457 | PC61 | 0.284633882 | 0.0003  | 0.99852 |
| PC62 | 3.728239076 | 0.00089 | 0.99546 | PC62 | 0.279146309 | 0.00029 | 0.99881 |
| PC63 | 3.364175208 | 0.00072 | 0.99618 | PC63 | 0.2564494   | 0.00025 | 0.99906 |
| PC64 | 3.164652073 | 0.00064 | 0.99682 | PC64 | 0.218460621 | 0.00018 | 0.99924 |
| PC65 | 3.077037279 | 0.00061 | 0.99743 | PC65 | 0.209880515 | 0.00017 | 0.9994  |
| PC66 | 2.938092583 | 0.00055 | 0.99798 | PC66 | 0.200357122 | 0.00015 | 0.99955 |
| PC67 | 2.68135552  | 0.00046 | 0.99844 | PC67 | 0.18945679  | 0.00013 | 0.99969 |
| PC68 | 2.577367689 | 0.00043 | 0.99887 | PC68 | 0.168336625 | 0.00011 | 0.9998  |
| PC69 | 2.511657965 | 0.0004  | 0.99927 | PC69 | 0.15377941  | 0.00009 | 0.99988 |
| PC70 | 2.406343074 | 0.00037 | 0.99964 | PC70 | 0.133412019 | 0.00007 | 0.99995 |
| PC71 | 2.360136801 | 0.00036 | 1       | PC71 | 0.113601245 | 0.00005 | 1       |
| PC72 | 6.98411E-14 | 0       | 1       | PC72 | 4.85374E-15 | 0       | 1       |

**Table S4\_module\_GENE**

| <b>Black</b> |         |         | <b>Blue</b> |           | <b>Brown</b> | <b>Pink</b> | <b>Red</b> | <b>Grey</b> |
|--------------|---------|---------|-------------|-----------|--------------|-------------|------------|-------------|
| ACO2         | ACACB   | RFX5    | LPHN3       | DENND1C   | NAT1         | ACP2        | ACAN       | ADRB2       |
| ADCY3        | ACADSB  | RGS1    | EHBP1       | ATF7IP2   | ADCY5        | ACP5        | AUH        | GYPC        |
| ARR3         | ACPP    | RGS4    | FKBP15      | ZFP2      | APLNR        | ACTA2       | BDKRB2     | RPL18       |
| DST          | ACTA1   | RLN1    | CUX2        | LRRC8E    | ALCAM        | ADCY7       | TSPO       | TAF4B       |
| SLC25A20     | ACVR1B  | RIT1    | ZCCHC11     | ZNF703    | ANK2         | AP1B1       | C1QBP      | NDC80       |
| CALR         | ADCY6   | RNASE2  | SYNM        | ASRGL1    | ANXA3        | AIF1        | CCND2      | ARRDC2      |
| CD151        | ADCY9   | RNASE3  | VPS8        | ARMC9     | SHROOM2      | ALDH1B1     | CD36       | CYB5R2      |
| LRBA         | ADCYAP1 | RPGR    | PSD3        | ACSF2     | ASPA         | ALOX5AP     | COX7B      | REXO4       |
| CDC27        | ADORA2B | RPA2    | PUM2        | RAB11FIP1 | AVPR1A       | AMPD3       | DR1        | CREB3L4     |
| CLN5         | ADORA3  | RPL15   | AHCYL2      | NUBPL     | BAI3         | AOAH        | ENPEP      |             |
| CPT2         | ADRA2A  | MRPS12  | ZDHHC17     | ORAI2     | BICD1        | APBB2       | ERCC4      |             |
| DUSP3        | ADRA2C  | RPN2    | KIAA0368    | TRABD     | BMX          | APOC1       | ETV3       |             |
| EVC          | ADRBK2  | RPS4X   | COTL1       | ULBP2     | CA3          | APOE        | FOXD1      |             |
| GTF2H4       | AP2A2   | RPS6KA1 | TMED3       | TNKS2     | CA4          | ARNTL       | GLG1       |             |
| HP           | AGTR1   | RPS6KA3 | SF3B1       | PBX4      | CAPN6        | ASAH1       | GLO1       |             |
| HSPA1L       | AIM1    | CLIP1   | ANGPTL2     | TTYH3     | CASP3        | ATP6V1B2    | HSPA9      |             |
| HTR1B        | AK2     | RYR3    | TGDS        | THSD7B    | CAV3         | ATP6V0C     | IL13RA1    |             |
| INSR         | ALDH3B1 | SALL1   | CBX7        | LY6G5C    | SERPINH1     | BCAT1       | MATN3      |             |
| JUNB         | ALOX5   | SCML1   | DAAM2       | TMEM121   | CDH2         | BCL2A1      | MCM7       |             |
| KLC1         | ALX3    | CCL7    | TTC9        | ITIH5     | CDH11        | BID         | MFAP1      |             |
| KRAS         | AMELY   | CCL18   | PIK3R5      | STARD5    | CIDEA        | PRDM1       | PBX3       |             |
| LIG3         | BIN1    | CCL20   | SLC16A8     | DDHD1     | CMA1         | BMPR1A      | PIGC       |             |

|        |          |         |          |          |        |         |          |
|--------|----------|---------|----------|----------|--------|---------|----------|
| MSN    | ANG      | CXCL6   | LILRA4   | APOL6    | CNTN1  | BRAF    | PLD1     |
| NDUFA2 | ANXA1    | XCL1    | TSPAN15  | ILKAP    | COL1A1 | BTK     | POLD2    |
| NDUFB6 | ANXA13   | SDC1    | LDOC1    | NPL      | COL4A2 | C1QA    | PPP2R1A  |
| NDUFS1 | APAF1    | SEC14L1 | SLC7A11  | FBXO38   | COL4A6 | C1QB    | PRKAG1   |
| NDUFV2 | APBA2    | SGCD    | RAB38    | CDADC1   | COL5A1 | C1QC    | DNAJC3   |
| NGFR   | APEX1    | SH3GL1  | APOL2    | TMEM163  | COL5A2 | C3AR1   | RNASEL   |
| NME4   | APOC2    | SLA     | C22orf31 | CDT1     | COL9A3 | CASP1   | MRPL23   |
| NOTCH3 | APOD     | SLC1A3  | TBC1D22A | LOC81691 | CSF3   | RUNX1T1 | RPL38    |
| NPC1   | AR       | SMTN    | PGLS     | DOCK8    | CTBS   | CD1D    | TRAPPC2  |
| OCRL   | ARAF     | SLC5A3  | LMOD1    | PPP1R14C | CTGF   | CD247   | SLC7A2   |
| PCBD1  | ARG2     | SLC6A3  | ARIH1    | RNF170   | CUX1   | CD8A    | TFDP2    |
| PDK3   | RHOH     | SLC6A12 | SULT4A1  | ADAMTS10 | DAB1   | CD14    | TIAL1    |
| ENPP3  | ARRB2    | SLC6A13 | RAB26    | TRIM56   | DACH1  | ENTPD3  | TMF1     |
| PFAS   | ARSB     | SLC9A1  | DFNB31   | LAS1L    | DES    | CD48    | UBE2L3   |
| PGAM1  | ARSE     | SLC15A2 | ZNF473   | CABLES2  | DIO2   | CD53    | XBP1     |
| PMP22  | ART3     | SLC34A1 | ABI3BP   | FCRL5    | DOCK3  | CD69    | ZNF91    |
| POLR2B | ASL      | SLC22A3 | RCHY1    | TCF7L1   | DTNA   | CD74    | TFEB     |
| PSKH1  | ATM      | SLC22A5 | TMEM158  | GSG1     | DYRK1A | CD52    | SF3A2    |
| RPS16  | ATOX1    | SLIT3   | AHCTF1   | CDCA3    | TOR1A  | CTSC    | MTMR1    |
| RRAS   | ATP2B1   | SMARCC1 | POT1     | KATNAL2  | EGR2   | CKMT2   | ALKBH1   |
| RXRA   | ATP5D    | SMARCD1 | MYRIP    | NUF2     | EPHA2  | CCR1    | EIF2B2   |
| SRPK1  | ATP6V1C1 | SMARCE1 | ZNF521   | FAM110A  | ENG    | COL7A1  | SLC25A14 |
| SURF1  | ATP6V1G2 | SMPD1   | PVRL3    | C18orf21 | EPHB6  | SLC31A1 | TGFBRAP1 |
| TAF11  | ATRX     | SIGLEC1 | KANK2    | CCDC3    | EYA4   | SLC31A2 | MINPP1   |
| TARBP1 | BAI2     | FSCN1   | TSKU     | FAM167A  | ERCC6  | CP      | RANBP9   |
| TBL1X  | BARD1    | SNRPA   | MOXD1    | DYNLRB1  | F2R    | CRY2    | ZNF197   |

|          |         |         |          |         |         |          |          |
|----------|---------|---------|----------|---------|---------|----------|----------|
| U2AF1    | BAX     | SNRPG   | OSBPL3   | PARP9   | F8      | CSF1R    | PSME3    |
| ZNF45    | BCHE    | SOAT1   | GLCE     | RIOK1   | FAP     | CTSB     | SPTLC1   |
| ZNF222   | BCL2L2  | SOD3    | CCDC9    | SYT15   | FBN1    | CTSS     | SMC2     |
| YEATS4   | BCL6    | SOX11   | CCDC69   | TMTC1   | FOXF2   | CTSZ     | GMEB1    |
| BAP1     | BCL9    | UAP1    | WSB1     | TAF3    | GAD1    | DAB2     | ZNF271   |
| GNPAT    | CFB     | SPAST   | TES      | HMCN1   | GALNT1  | DGKG     | PPP1R13L |
| CUL4A    | ZFP36L2 | SPI1    | TRAF3IP1 | MRO     | GAS8    | DMPK     | COPS8    |
| KLF11    | BSG     | SPINK1  | RSL1D1   | SPATA16 | GFRA1   | DOK1     | PRDM4    |
| HIRIP3   | KLF9    | SPINT1  | PHGDH    | CTTNBP2 | GFRA3   | DPAGT1   | DZIP1    |
| PEX3     | KLF5    | SPP1    | B3GAT3   | EMILIN2 | GPC3    | ARID3A   | DENND3   |
| LMO4     | BUB1B   | SPTBN1  | FAM50B   | PRAM1   | GLI1    | DUSP2    | TCF25    |
| PDE8B    | C2      | SQLE    | OR4C1P   | ZIC4    | GMDS    | TYMP     | MESDC2   |
| EIF3H    | C5AR1   | SSTR2   | FBXO24   | QRFPR   | GPX7    | EIF4EBP1 | FAF2     |
| SNX3     | FMNL1   | ST14    | SLC13A4  | ZNRF3   | HAS2    | EMP2     | XPO6     |
| CTNNAL1  | CA2     | STAT6   | FBXO9    | FAM175A | HBD     | CLN8     | TBC1D12  |
| RAB11A   | CA12    | SULT1E1 | SEZ6L2   | USP48   | HRC     | EVI2A    | EXOC7    |
| CES2     | CALM1   | STK10   | PLEK2    | MEX3B   | HSD17B3 | EVI2B    | ATMIN    |
| GMPS     | CAPN1   | VAMP7   | HEYL     | ZMYND15 | HTR2A   | F10      | DNAJC13  |
| SQSTM1   | CASP5   | SYK     | TIMM13   | SYT3    | IGSF1   | FCER1G   | KIAA0895 |
| ITGB1BP1 | CASQ2   | TACC1   | ITGB1BP2 | HSDL2   | IL3RA   | FCGR2A   | DDAH1    |
| CDYL     | CAV2    | ADAM17  | GREM1    | HAGHL   | INHBB   | FCGR2B   | PLXNB2   |
| PIGB     | CBFA2T3 | TAGLN   | CKAP2    | BTBD10  | ITPK1   | FER      | ZKSCAN5  |
| RB1CC1   | CBR3    | TAF6    | MRPL46   | RNF135  | KCNB1   | FOLR2    | PANX1    |
| LCMT2    | CCIN    | MAP3K7  | TBL2     | CAPNS2  | KCND2   | FPR1     | CCDC28A  |
| ZBTB24   | CCK     | TAP2    | NUFIP1   | NUDT22  | KCNK3   | FPR3     | UBXN7    |
| KIAA0020 | CD1B    | TBX2    | OPLAH    | HPS3    | KHK     | FRK      | FBXW2    |

|         |         |         |          |          |           |         |         |
|---------|---------|---------|----------|----------|-----------|---------|---------|
| WDR1    | CD1E    | TBX15   | NBEA     | C2orf40  | KRT18     | FYB     | BBS9    |
| GJC1    | CD2     | TBXA2R  | GPR160   | CARD11   | L1CAM     | GCHFR   | UTP20   |
| ABCF2   | CD3G    | TBXAS1  | SIGLEC7  | HHIPL1   | LRPAP1    | GGCX    | SLCO3A1 |
| HUWE1   | CD19    | HNF1A   | LAT      | BRSK1    | MAOB      | GLRX    | DNAJC15 |
| PDCD7   | CD28    | TCF7L2  | ANKRD1   | EFCAB7   | MFAP2     | GM2A    | SNX11   |
| HIPK3   | CD80    | TCN2    | DAPP1    | ZC3H8    | FOXO4     | GNA15   | LRP12   |
| PDIA6   | CD86    | TCP11   | B9D1     | FNDC1    | MME       | GPR1    | STOML2  |
| RAMP1   | CD33    | TEC     | MTBP     | ZNF469   | MPP2      | GPR20   | G0S2    |
| NOD1    | SIGLEC6 | TECTA   | TAF5L    | NTNG2    | MYBPC1    | GPR34   | C6orf48 |
| PPIE    | CD34    | TGFB1I1 | CYTH4    | EMR3     | MYL1      | CXCL1   | COQ6    |
| POMT1   | CD72    | THBS2   | FILIP1   | SLC9A7   | MYO10     | GSTZ1   | ASCC1   |
| MTHFD2  | CD79A   | THBS4   | CPAMD8   | MS4A14   | NBL1      | MSH6    | YARS2   |
| TXNL4A  | CDC20   | TCHH    | CHIA     | LOXL3    | NPY5R     | GZMA    | CRYL1   |
| PTPN21  | CDC25B  | TIMP4   | SIGLEC9  | NFKBID   | TNFRSF11B | HCK     | SCCPDH  |
| PMF1    | CDH3    | TK1     | GPR82    | TRIM52   | OXTR      | HEXA    | MRTO4   |
| SPEN    | CDK5    | TLN1    | GPKOW    | RPUSD4   | SERPINE1  | HHEX    | PCDH12  |
| PHLDA3  | CDKN2A  | TLR1    | SIT1     | AIFM2    | PCDH8     | HIP1    | REV1    |
| SH3BP4  | CENPE   | TLR4    | TNFRSF21 | C1orf198 | PCDH9     | HLA-DMB | PPIL1   |
| SDF2L1  | RCC1    | TSPAN8  | CSDC2    | TBRG1    | SERPINA5  | HLA-F   | PTRH2   |
| HYPK    | CHGB    | TMOD1   | CNTN6    | RNFT2    | PCK1      | HMGB3   | CMPK1   |
| CCDC19  | CHI3L2  | TNF     | LSM3     | FIZ1     | PCP4      | HMOX1   | NUDT9   |
| MTO1    | CHKA    | TNS1    | SULT1B1  | FAM104A  | PCSK2     | AGFG1   | STX18   |
| CNRIP1  | CHN2    | TPD52L1 | SRPX2    | CORO6    | PDE2A     | IRF8    | TMCO1   |
| SH2B1   | LYST    | TPM1    | VENTX    | RBM17    | PDE9A     | CFI     | MTMR12  |
| LDLRAP1 | CHRNA2  | TPP2    | SPINK4   | MGC16275 | PGM3      | IFIT3   | WDR5B   |
| TIMM9   | CKB     | TRAF3   | PDLIM3   | RERG     | PHKA1     | IGF1R   | INO80   |

|          |         |        |          |          |         |        |          |
|----------|---------|--------|----------|----------|---------|--------|----------|
| INTU     | AP1S1   | TRPM2  | ADAMDEC1 | NKD2     | PLXNB1  | IGJ    | SLC41A3  |
| FLVCR1   | CLCN6   | TSC1   | PCDH11X  | KIAA1755 | PLXNB3  | IL2RB  | OXSM     |
| SERTAD3  | CCR5    | TSSC1  | ZNF638   | ZC3H12C  | PMP2    | IL10RA | SHQ1     |
| CXXC1    | CMKLR1  | TST    | KCNMB4   | SCIN     | POU3F3  | CXCL10 | UEVLD    |
| ZNRD1    | PLK3    | TUFT1  | HTRA2    | RSPH1    | PPARG   | IRF7   | ZCCHC8   |
| ISOC1    | CNN1    | TULP3  | TOR2A    | HPS4     | PPL     | ISG20  | LUC7L    |
| UBXN1    | CNP     | TXK    | CECR6    | LMLN     | PPP1R1A | ITGAL  | CDK5RAP2 |
| ZNF639   | COL4A3  | TYRP1  | IGLV6-57 | SIGLEC10 | PKIA    | ITGAM  | DOK5     |
| ECSIT    | COL4A4  | UBE2B  | REM1     | KCNK17   | MAP2K6  | ITGB2  | ZC3HAV1  |
| SIRT6    | COL10A1 | UCP2   | OSTM1    | KLHL6    | PTGER3  | ITGB7  | WRNIP1   |
| UBE2D4   | COL11A1 | UFD1L  | MRPL42   | FAM181A  | RORB    | KCNMA1 | SDR39U1  |
| ASB2     | COL16A1 | UTRN   | COMMD5   | HS6ST2   | S100B   | KLRB1  | TOMM22   |
| ZFAND6   | COX4I1  | VAV1   | SETD2    | EMILIN3  | CLEC11A | LCP1   | ACN9     |
| SPATA6   | COX11   | VHL    | CCDC59   | SNX21    | SCN3A   | LIF    | AVEN     |
| OTUD4    | CPA3    | VIPR1  | THYN1    | ZFAND2A  | SCN7A   | LIFR   | BIRC6    |
| BCAS3    | CPE     | VLDLR  | UBE2T    | SPOCD1   | SCNN1B  | LNPEP  | ZNF512B  |
| RETSAT   | CLDN7   | VSNL1  | COMMD9   | ESAM     | CCL21   | LYN    | KLHL8    |
| WHSC1L1  | CPM     | WARS   | PYCARD   | CCDC149  | CCL23   | LYZ    | ZNF319   |
| FAM120C  | CRABP2  | CORO2A | TAGLN3   | LMF2     | SELE    | MARCKS | USP28    |
| C4orf27  | CRHR1   | WFS1   | CD274    | C12orf29 | SEMA3F  | MAN2B1 | SRPRB    |
| SBNO1    | CRIP2   | WT1    | PARVB    | DDX60L   | SFRP4   | MAP2   | FASTKD5  |
| C11orf57 | CRMP1   | XPA    | SNX10    | ANKRD40  | SFTPD   | MARK1  | AASDHPPT |
| ELP2     | HAPLN1  | ZIC3   | SNX15    | SESTD1   | SCG5    | MDK    | C17orf75 |
| SMEK1    | CSF2RA  | ZNF16  | GPR132   | ANKRD44  | SHOX2   | MEST   | RHBDF1   |
| PARVA    | CSRP1   | ZNF23  | PDZRN4   | RSAD2    | SIM1    | MICB   | MPP5     |
| AGK      | CTLA4   | ZNF33B | NRBP1    | NEXN     | SNCG    | MLF1   | WDR13    |

|          |         |         |          |          |           |          |         |
|----------|---------|---------|----------|----------|-----------|----------|---------|
| NGLY1    | CTRL    | ZNF133  | RHOD     | NLRP12   | SOX10     | MMP19    | SMURF2  |
| VPS11    | CTSO    | ZNF142  | SLC39A3  | ZNF804A  | SPARC     | NUDT1    | FBXL17  |
| ZNF302   | CX3CR1  | ZNF143  | LMCD1    | CHRDL1   | SRD5A1    | MYO1F    | MRPS11  |
| DIABLO   | CXADR   | VEZF1   | TBX21    | TIMD4    | SSR1      | MX2      | TRAK2   |
| AKR1B10  | CYBB    | ZNF165  | EMR2     | NDUFAF2  | STAC      | PPP1R12B | GEMIN6  |
| KIAA1468 | CYP4B1  | RNF112  | CD209    | DAPL1    | MED22     | NFIX     | ACTR5   |
| EPB41L5  | CYP27A1 | ZNF195  | SOCS7    | ZNF461   | SYP       | NFKBIE   | CEP76   |
| COPS7B   | CD55    | ZNF215  | EHD4     | TMEM132C | TAC1      | OCA2     | CHD9    |
| ZNF574   | DAPK1   | MAP3K12 | CDR2L    | MEX3A    | THRSP     | P2RX4    | EDEM3   |
| MRPL36   | DEFA4   | ZXDA    | SMARCAL1 | NAF1     | THY1      | P2RY6    | TSEN2   |
| AHNAK    | CFD     | RNF103  | IL21R    | ATXN3L   | TSPAN7    | CNTN3    | ITFG1   |
| TMEM185B | DIAPH1  | SCG2    | CUZD1    | SLC38A5  | TNFAIP6   | PCDH7    | SPRY4   |
| DHRS11   | DLG1    | USP7    | TAS2R9   | ZNF276   | TNNT3     | PDE3B    | PLVAP   |
| NLRX1    | DLX5    | KCNAB1  | VILL     | B3GNT7   | TPO       | PGAM2    | CCM2    |
| CEP63    | DOCK2   | SLBP    | SLC35C2  | TMEM44   | TRO       | PGK1     | STK40   |
| ZNF436   | DPP4    | ST8SIA4 | BOLA1    | SYCE1    | TNFSF4    | PGM5     | TM2D1   |
| PTDSS2   | DPT     | SLC39A7 | ZNF691   | CACNA2D4 | VIPR2     | SERPINE2 | FYTTD1  |
| MAP1LC3B | DSC2    | FZD3    | MRPL2    | TADA2B   | WNT11     | PLAUR    | COQ5    |
| UCK1     | DSP     | ARHGEF5 | SIDT2    | FOXQ1    | ZIC2      | PLCB4    | VPS25   |
| JAM3     | DUT     | TUSC3   | DYNC1LI1 | PPP1R14A | ZNF124    | PLCL1    | DISP1   |
| ZNF394   | E2F4    | ADAM12  | CERCAM   | C1orf85  | PXDN      | PLEK     | DIXDC1  |
| USP42    | EBF1    | MLF2    | HN1      | TMEM106A | EPM2A     | CTSA     | TRIM4   |
| C19orf44 | LPAR1   | SSPN    | C3orf18  | MFSD3    | STAM      | PPP1R3C  | EXOC3L2 |
| FBXW9    | EDN3    | AKAP1   | DCTN4    | SDSL     | ALX1      | PRKAA2   | LIN52   |
| LLPH     | EFNB3   | SYMPK   | LEF1     | SIGLEC11 | MIA       | PRKD1    | ALKBH8  |
| COX4I2   | EGR4    | CHAF1B  | HSPA14   | PRO2852  | HIST2H2BE | PTAFR    | TMEM129 |

|          |        |           |          |          |          |         |           |
|----------|--------|-----------|----------|----------|----------|---------|-----------|
| DNAJC14  | EMD    | EPX       | GLRX5    | PALM2    | NME5     | PTGER2  | ORMDL1    |
| RHOT2    | EMR1   | HIST1H2AM | PIPOX    | NLRP3    | PPFIBP2  | PTK2    | EFHC1     |
| ZNF766   | EMX2   | MAD1L1    | UBAP1    | ERMAP    | ITGA10   | PTPN6   | ZNF689    |
| LYRM7    | ENO1   | BCAR3     | GOLM1    | CARD16   | DGKD     | PTPRC   | THEM4     |
| RNF185   | ENO2   | SOAT2     | TLR7     | MBD6     | APOL1    | RAC2    | C15orf40  |
| TIMM50   | EPHX2  | DYRK3     | GMIP     | TMEM200A | RUVBL1   | RAP2B   | C9orf85   |
| TOE1     | ERCC2  | DHX16     | NRN1     | SLAMF6   | PTCH2    | RARRES1 | PIWIL4    |
| IQCD     | ETV5   | CUL2      | FAM53C   | OSBPL6   | ALDH4A1  | RFXAP   | LYSMD4    |
| ZSWIM7   | ETV6   | CUL1      | TEX264   | C1QTNF1  | B3GALNT1 | RNASE6  | ZNF738    |
| C15orf61 | EYA1   | SORBS2    | RWDD1    | C1QTNF2  | NOL4     | RRAD    | CCDC117   |
| SLFN5    | EYA2   | GPR65     | BIN2     | C1QTNF6  | ADAM9    | RRM2    | C18orf54  |
| RNF168   | F2RL1  | CILP      | PRKAG2   | FBXO17   | GGH      | RYR2    | ZNF383    |
| PTPLB    | FABP4  | PPFIBP1   | PCYOX1   | GBP5     | SEMA5A   | S100A11 | PAPD4     |
| TMEM192  | FAH    | PPFIA2    | DCDC2    | NOSTRIN  | USP2     | SAT1    | PRSS35    |
| SVIP     | FBN2   | PPFIA1    | NOP16    | ALPK2    | NOG      | ATXN2   | NSMCE1    |
| ANKRD52  | FCGR1B | ENC1      | C11orf73 | RASGRP4  | ADIPOQ   | CCL4    | MTIF3     |
| EID3     | FDXR   | KCNAB2    | NCKIPSD  | FAM122A  | CABP1    | CCL5    | TBCEL     |
| MICA     | FGF2   | CHST1     | GDE1     | TLCD1    | RGS6     | SELL    | ALKBH3    |
|          | FGF8   | KMO       | RASD1    | RBP7     | GCC2     | SELPLG  | N6AMT2    |
|          | FGF9   | KLF7      | GINS2    | RAB39B   | HERPUD1  | SETMAR  | LRRC57    |
|          | FGF13  | PPAP2B    | NUB1     | FAM129A  | ZNF536   | SH3BGR  | ARL16     |
|          | FGFR1  | UNC5C     | MPP6     | MRGPRF   | TOX      | STAT4   | STAC2     |
|          | FGG    | RNASET2   | WBP11    | SCGB3A2  | RIMS3    | SULT1A1 | MED11     |
|          | FGL1   | IRS2      | ARID4B   | SLC16A10 | PHYHIP   | SURF4   | PEF1      |
|          | FLNA   | EIF3B     | HIGD1B   | TAGAP    | SLC12A6  | TAP1    | LOC728613 |
|          | FLNC   | MARCO     | ATP8A2   | ZNF354B  | KCNE2    | TARBP2  |           |



|        |           |          |          |          |          |
|--------|-----------|----------|----------|----------|----------|
| FLT3   | ABCC3     | ZAK      | OLFM3    | ARPC1B   | TEAD3    |
| FUT4   | TNFRSF25  | SIX4     | PIK3AP1  | TSPAN1   | TFDP1    |
| FUT8   | GPAA1     | BCL11A   | MMP21    | ANGPTL7  | TLR2     |
| GABRB2 | MYOM1     | TM6SF1   | SLC36A4  | LRRC17   | TLR5     |
| GAP43  | TNFSF14   | P2RY13   | LRIG3    | RAMP3    | GPR137B  |
| GBP1   | CDS2      | GPR84    | SP7      | TRDN     | TRAPPC10 |
| GCNT1  | TNFRSF14  | POLE3    | GTSF1    | ATP8A1   | TNNC1    |
| GDF2   | FADD      | CYCS     | BTBD11   | RAPGEF3  | TPM2     |
| GDF10  | SIGLEC5   | TREM2    | SLAIN1   | POSTN    | TRPS1    |
| GFI1   | TNFRSF11A | WNT4     | C14orf28 | CHL1     | UGCG     |
| GGT5   | SUCLA2    | YIPF1    | C14orf79 | KDEL3    | COL14A1  |
| GJA4   | IQGAP1    | KCTD5    | ACOT4    | ATF7     | VCL      |
| GK     | NRP2      | ANLN     | IQCK     | TDRKH    | LAT2     |
| GLDC   | CD84      | MOV10L1  | PAQR4    | RAB31    | WNT5A    |
| GNAI1  | WISP2     | ARMCX6   | EARS2    | TPPP     | XG       |
| GNG4   | WISP1     | FAM105A  | CANT1    | ADAMTS8  | XK       |
| GNGT2  | HDAC3     | APBB1IP  | SLC43A2  | NUPL2    | XPNPEP1  |
| GPM6B  | VNN1      | MAGEL2   | OSCAR    | NUDT6    | ZNF148   |
| CXCR3  | SGPL1     | GNL3L    | CPT1C    | CNKS2    | LAPTM5   |
| GPR18  | FUBP1     | GNB1L    | LRRC25   | MLXIP    | CXCR4    |
| GPR19  | SKAP2     | PARP14   | SHE      | ARHGAP15 | SLMAP    |
| GRK5   | KYNU      | FAM63B   | IFFO2    | PLA2R1   | LST1     |
| GRK6   | PLOD3     | LRRN3    | SLC44A3  | TNIK     | PLA2G7   |
| GRB10  | MPZL1     | MPHOSPH8 | PODN     | PEG10    | EOMES    |
| GRB14  | SOCS3     | FAM20A   | UBXN10   | COBL     | PIP5K1B  |
| GRIA3  | CCRL2     | DIRAS2   | FCRLB    | CRTC1    | SPOP     |

|          |         |          |          |         |          |
|----------|---------|----------|----------|---------|----------|
| GRINA    | DOK2    | BNC2     | LIX1L    | ABCA6   | LTBP4    |
| CXCL3    | PSTPIP1 | ZCCHC10  | LYG1     | GCAT    | TPST2    |
| GRP      | ANGPTL1 | SYTL2    | MITD1    | NPTXR   | GAS7     |
| GSTM5    | LDB2    | SIDT1    | FBLN7    | PIGN    | CST7     |
| GUCY1B3  | RGN     | ANKRD49  | REG3G    | FLRT1   | CBX4     |
| GYG1     | INA     | PAQR5    | C2orf76  | BAMBI   | CDC14B   |
| GZMH     | SLC16A6 | FAM46C   | UBR3     | BACE2   | YARS     |
| GZMB     | SLC16A5 | TMEM104  | C2orf50  | MGAT4C  | SLC25A12 |
| GZMK     | FAM50A  | BCOR     | CCDC148  | SOSTDC1 | HSD17B6  |
| HIST1H1C | SYNGR3  | ANKHD1   | DNAJC19  | PLEKHG3 | AOC3     |
| HADH     | SYNGR1  | UHRF1BP1 | FAM131A  | SLITRK5 | VAMP8    |
| HBB      | DGKI    | ALKBH5   | OCIAD2   | KIF26A  | JRKL     |
| SERPIND1 | RASSF9  | RNF43    | SPATA18  | OR10J1  | TNFSF13  |
| HELLS    | DEDD    | SEMA4C   | AASDH    | CNNM4   | INPP4B   |
| NCKAP1L  | SLC16A7 | CMTM6    | TMEM171  | SRPK3   | FCGBP    |
| HGF      | DCLK1   | SARS2    | NUDCD2   | DENND2A | PER3     |
| HK2      | BMP15   | OCIAD1   | SHROOM1  | CDH19   | PKD2L1   |
| HK3      | LGI1    | C19orf24 | ADAT2    | TRIB2   | SLC7A7   |
| ZBTB48   | FAIM3   | HEATR3   | B3GAT2   | DCPS    | SLC7A6   |
| HLA-DQB1 | IL32    | FKBP14   | CD109    | TMOD2   | PAPSS2   |
| MR1      | CRLF1   | MOCOS    | FAM92A1  | SOX8    | KCNQ4    |
| HMGA1    | BZRAP1  | PLEKHB2  | ADHFE1   | TMEM216 | FIBP     |
| HMMR     | MFHAS1  | KIF26B   | AGPAT6   | SCARA3  | MAGI1    |
| NR4A1    | STK17B  | SLFN12   | C9orf135 | EMCN    | PTTG1    |
| HOXA11   | CYTH1   | ANO10    | DOCK11   | SELT    | CD83     |
| HOXB7    | BCL7B   | FIGN     | TCP10L   | COQ3    | CD163    |

|         |          |           |          |          |          |
|---------|----------|-----------|----------|----------|----------|
| HOXC6   | TRIP10   | CDCA8     | S100A16  | MYO3A    | AIM2     |
| HOXD8   | ZNHIT3   | TMEM38B   | TCEAL2   | RBM11    | FHL5     |
| HSPA4   | SNAP29   | SDAD1     | ZBTB46   | CLIC6    | ROCK2    |
| TNC     | EFTUD2   | DARS2     | BRI3BP   | MTRF1L   | APBA3    |
| IBSP    | CER1     | ARHGEF10L | DYNLL2   | SAMD9    | SNCAIP   |
| IDH1    | PIIG     | TMEM33    | NRSN1    | PALMD    | ISG15    |
| IDH3G   | COX5A    | CEP55     | ZNF280B  | TMEM45A  | PPM1F    |
| IFRD1   | LIPG     | BBS7      | SIRPA    | SAMD4B   | HS2ST1   |
| IGBP1   | KCNK6    | FANCI     | TMEM86A  | APPL2    | ZNF516   |
| IGFBP5  | ABCG2    | SLC38A7   | PRICKLE1 | ETNK2    | SDC3     |
| IGHM    | LY86     | STEAP3    | E2F7     | GALNT10  | DOCK4    |
| IKBKB   | PGS1     | C7orf43   | PRIMA1   | KIF21A   | STARD8   |
| IL1B    | SLC4A8   | TMEM19    | FBXL16   | PPP1R9A  | KIAA0101 |
| IL1RAP  | MYOT     | PHF10     | TMED6    | RADIL    | SPOCK2   |
| IL2RG   | RPH3AL   | TMEM140   | CD300LF  | HR       | CLEC2B   |
| IL10    | ADAMTS2  | SPTLC3    | CCDC42   | WSB2     | DPP3     |
| IL12A   | ADAMTS1  | DDX19A    | SLFN13   | SULF2    | ATP9A    |
| IL12RB1 | GDF15    | PLCXD1    | WIPF2    | UBFD1    | TRAP1    |
| IL18    | MPDU1    | HJURP     | CBLN2    | ANKH     | DHRS9    |
| ILK     | BAG5     | PI4K2A    | ANKRD29  | IFNK     | LHFPL2   |
| IDO1    | BAG3     | LRRC59    | TMEM190  | ANKS1B   | STX6     |
| INPP5A  | CXCL14   | MEG3      | IGFL2    | NDUFA4L2 | HNRNPR   |
| INPP5D  | BCAR1    | TNFRSF19  | FAM187B  | STOX2    | IGSF6    |
| IPP     | CLOCK    | H2AFY2    | CILP2    | RCN3     | IRX5     |
| IRF5    | APOBEC3B | SLC30A10  | C19orf25 | NDRG2    | NET1     |
| ITGA2   | ENTPD4   | MIOX      | ZNF569   | NLGN4X   | LILRB2   |

|       |           |          |           |          |         |
|-------|-----------|----------|-----------|----------|---------|
| ITGA7 | CREB5     | OTUD5    | PHF13     | SORCS2   | ZNF267  |
| ITGAX | NFE2L3    | ITLN1    | GLIS1     | SEMA6A   | KLF2    |
| ITIH2 | NCOR1     | KIF16B   | FAM109B   | KIAA1462 | DLC1    |
| ITIH3 | IKBKE     | LRRC40   | SLC38A11  | CADM3    | MAD2L2  |
| ITPR1 | CTR9      | DEPDC1   | GPR155    | ENOPH1   | ENOX2   |
| ITPR2 | PHF14     | FLVCR2   | LRRC34    | RHOA     | TACC2   |
| IVD   | KIAA0391  | HIF1AN   | BTLA      | WIZ      | SPINT2  |
| JAK2  | EDEM1     | NBPF1    | RNF38     | ENPP5    | CNPY3   |
| KCNA3 | ESPL1     | NECAP2   | CCDC50    | HAPLN2   | SLC12A7 |
| KCNA5 | FAM131B   | ZNF334   | CNTN4     | HPSE2    | LILRB1  |
| KCNJ5 | USP34     | DOK4     | CCDC112   | C2orf43  | KDELR1  |
| KCNJ6 | GPRASP1   | N4BP2    | SAMD3     | FKBP10   | MLLT11  |
| KCNJ8 | RNF144A   | HHAT     | C6orf165  | PCIF1    | MAPRE2  |
| KCNN4 | DHX38     | EDEM2    | ZNF746    | TNMD     | ADAP1   |
| KDR   | DLGAP5    | INTS9    | ATP6V0E2  | LEPRE1   | PIM2    |
| KIT   | SCRN1     | C1orf106 | AMZ1      | SOX17    | DIDO1   |
| KLRC3 | ARHGAP11A | PRR11    | LOC157740 | ZMAT3    | CORO1A  |
| KIF11 | RGP1      | ZNF839   | MAMDC4    | CDH22    | LDB3    |
| KRT13 | ARHGEF17  | MCTP2    | KIAA2026  | TNS3     | SLC2A6  |
| KRT14 | TRIM14    | FGD6     | C11orf65  | SLC30A5  | CHEK2   |
| LAIR1 | JAKMIP2   | ADAP2    | DGKH      | CYP4F12  | DUSP10  |
| LAMA5 | MELK      | ALLC     | CLEC14A   | PRRG4    | DDX19B  |
| LAMB1 | KIAA0125  | ASH1L    | DYX1C1    | KDELC1   | MGAT4A  |
| LAMB3 | OSBPL2    | NKRF     | PGBD4     | TCTN1    | VSIG4   |
| STMN1 | ZBED4     | MYO5C    | NAGS      | FAM184A  | EXOSC8  |
| LCK   | TELO2     | NXF5     | ZNF600    | ZNF419   | TWF2    |

|        |         |          |          |          |         |
|--------|---------|----------|----------|----------|---------|
| LCP2   | UBAP2L  | PCDHB15  | LGI4     | CLIP4    | SYNPO   |
| LCT    | KLHL21  | PCDHAC1  | ZNF100   | CLMN     | PHLDA1  |
| LGALS2 | FAM20B  | RNF17    | APCDD1L  | MMRN2    | LPHN1   |
| LGALS8 | IQSEC1  | BTNL2    | FAM171B  | HDAC11   | NCBP2   |
| LIG1   | KIF14   | CPXM1    | MMAA     | ZNF442   | KIF1B   |
| LIG4   | P2RY14  | PRMT8    | OLFML2A  | UXS1     | DCUN1D4 |
| ABLIM1 | HS3ST4  | DNAJC12  | GLIS3    | FHOD3    | STAB1   |
| LIMK1  | SLC23A1 | C10orf2  | ZCCHC12  | EFHC2    | KANK1   |
| LIPC   | TNFSF15 | POLE4    | FUT11    | PDGFD    | ANKRD12 |
| LMAN1  | AKT3    | KCNK13   | CLEC4C   | GKAP1    | CAMTA1  |
| LOX    | KCNE3   | SUCNR1   | ASXL1    | CCDC68   | DMXL2   |
| LPP    | BCL2L10 | SLAMF8   | SYNPO2   | ADAM33   | SYNE1   |
| LRP1   | BCL2L11 | TCEAL7   | ZNF675   | YIPF5    | QPRT    |
| LRP3   | PARP3   | C15orf39 | PPAPDC1A | C1orf21  | HEY2    |
| CD180  | TOM1    | MEIS3    | MPZL3    | SOX7     | TSPAN12 |
| M6PR   | DNAJB6  | SEMA3G   | AMN1     | CRISPLD2 | CLEC5A  |
| MXD1   | UBA2    | CA10     | ADCY4    | FGFBP2   | RABGAP1 |
| MAD2L1 | IL18BP  | ARNTL2   | UBR1     | ARMC2    | LY96    |
| MAF    | TSPAN5  | C5orf15  | EME2     | SLITRK6  | PLD3    |
| MAL    | PPIF    | FAM20C   | NLRC3    | CAMKK1   | PLA2G15 |
| MAOA   | KIF20A  | KIF15    | TTC21A   | PCGF5    | FTSJ1   |
| MAS1   | ARL4C   | ENTPD7   | TCTEX1D1 | PPAPDC1B | FJX1    |
| MCAM   | RASGRP1 | PCNP     | SPAG17   | PLXDC2   | QPCT    |
| MCF2   | LRPPRC  | NAT14    | CRTC2    | TOX2     | TXN2    |
| MDFI   | EBI3    | CAMK1D   | LIPH     | PPP1R16A | PNKD    |
| MDM2   | AASS    | LPAR5    | GAPT     | TMEM141  | EGFL6   |

|         |          |           |          |          |         |
|---------|----------|-----------|----------|----------|---------|
| MEF2D   | SLC25A15 | PLXDC1    | HTRA4    | MYLK2    | SUSD5   |
| MEIS1   | SORBS3   | LYRM4     | ADAM32   | FHDC1    | FBXO8   |
| MEIS2   | TSHZ1    | MAN1C1    | CCDC107  | FAM110B  | AK5     |
| MAP3K4  | ALG3     | TMEM159   | SAMD9L   | IGFN1    | GBGT1   |
| MEN1    | MPHOSPH9 | ASPHD2    | ZCCHC24  | TP53RK   | FHOD1   |
| MEOX1   | KLRG1    | ADAMTSL3  | ARMC3    | MED8     | BLNK    |
| MFAP4   | GPA33    | SEPN1     | SLC37A2  | CYGB     | TFPT    |
| MFGE8   | COQ7     | THAP11    | LRRC63   | XKR4     | GPR171  |
| MGAT2   | NBR2     | SPC25     | HNRNPUL2 | OSBPL8   | HCFC2   |
| MKI67   | RCAN2    | AS3MT     | NT5DC1   | PTPMT1   | GMPPA   |
| NR3C2   | LRRC23   | NDRG3     | FAM162B  | GPR146   | SEC61A1 |
| MMP1    | RASGRP2  | SLC12A5   | BEND6    | CMTM5    | PILRA   |
| MMP2    | TIMM17B  | GRAMD1B   | TMEM217  | IP6K3    | SH3KBP1 |
| MMP11   | EFS      | KIAA1211  | FGD2     | FAT3     | SCAPER  |
| MMP12   | DNAJA2   | RNF150    | RBM24    | ERP27    | CHST11  |
| MMP13   | CCNO     | NLN       | TWISTNB  | FRMD6    | CLEC4A  |
| MMP14   | TNIP1    | ODF2L     | SDK1     | LEO1     | SOST    |
| ALDH6A1 | LAMC3    | AHRR      | DAGLB    | HSPB6    | RRP15   |
| MPV17   | TLR6     | KIDINS220 | PRR15    | TSHZ2    | APH1A   |
| MPZ     | PCGF3    | ZNF608    | RSBN1L   | ACVR1C   | IRAK4   |
| MSR1    | CCL26    | MTUS1     | SLC35F1  | C6orf141 | AADAT   |
| MT1M    | YAP1     | XPO5      | CDC26    | PNCK     | RAB9B   |
| MXI1    | N4BP2L2  | GPR158    | STAC3    | MACROD2  | ZNF571  |
| MYH10   | TIMM44   | CASKIN2   | ZBTB38   | C10orf82 | RASL12  |
| MYH11   | EIF3M    | STARD9    | MSRB3    | PLEKHA7  | CYP39A1 |
| MYLK    | CAP2     | HECW2     | YTHDF3   | SLC30A7  | FKBP11  |

|          |          |          |          |         |          |
|----------|----------|----------|----------|---------|----------|
| MYO1C    | CIB2     | PCDH19   | EHBP1L1  | CHADL   | PLAC8    |
| MYO5A    | DEAF1    | ALPK3    | CNIH2    | ZNF385B | MS4A4A   |
| MYO6     | KAT5     | MICAL3   | MCOLN2   | C3orf55 | PLA1A    |
| MYO7A    | IPO8     | PDZD4    | NPNT     | IGSF11  | FAM49B   |
| MYO9A    | ATG7     | DIP2B    | SERINC5  | KLB     | CECR1    |
| MYOC     | BATF     | RANBP10  | FRMD3    | IRX2    | FXYD5    |
| PPP1R12A | DCTN2    | KIAA1467 | C1orf101 | BTNL9   | TREM1    |
| NAGA     | ARFGEF2  | LRCH2    | ARHGAP30 | TMEM74  | SH3TC1   |
| NAIP     | CCT7     | LRRN1    | IL4I1    | LCN6    | SASH3    |
| NAP1L2   | USP16    | CCDC146  | BEST4    | KANK4   | PRR13    |
| NCBP1    | SH2B2    | RNF213   | RGL4     | LONRF2  | CPVL     |
| NCL      | PDPN     | VAT1L    | NAP1L5   | DAND5   | ZNHIT6   |
| NDUFA4   | RAD51AP1 | CPNE5    | P4HA3    | PLD5    | SLC35F2  |
| NDUFA9   | YKT6     | DENND1A  | CCDC88B  | ANKRD23 | XAF1     |
| NDUFB4   | KHDRBS3  | MARK4    | TTC9C    | CMYA5   | ZNF853   |
| NEFH     | CD226    | HES4     | HARBI1   | ANO5    | GIPC2    |
| NEFL     | CGREF1   | G6PC2    | DPY19L2  | UNC5B   | RMND1    |
| NF2      | PNMA2    | SLAMF7   | GPR137C  | VSTM2A  | UBE2W    |
| NFIA     | CORIN    | SLC46A2  | VMO1     | CADM2   | SLC29A3  |
| NFIB     | POLQ     | PTBP2    | PIGW     | EBF3    | SLC22A15 |
| NMB      | PLK4     | CXCL16   | CISD3    | KANK3   | TBC1D2   |
| NOV      | RFPL1S   | TP53INP2 | SLC13A5  | HSPA12A | TRIM36   |
| NOVA2    | RAI2     | NLRC4    | PTRF     | PGM2L1  | SOX6     |
| NPR1     | KIF1C    | HIVEP3   | METRNL   | IGSF10  | BMP2K    |
| NPY1R    | GRAP     | UBL5     | LAMA1    | TUSC5   | H2AFJ    |
| NRGN     | HBS1L    | PLEKHA2  | SIGLEC15 | UBAC2   | MBD5     |

|        |         |         |           |         |          |
|--------|---------|---------|-----------|---------|----------|
| NTF3   | NEK6    | RXFP1   | ZNF547    | GPIHBP1 | RNF130   |
| NTRK1  | IQGAP2  | LGR6    | C20orf197 | KLRG2   | RCC2     |
| NTRK2  | CYSLTR1 | TMEM35  | SLC9A9    | LRRTM1  | BCCIP    |
| ROR1   | SEC24A  | AVPI1   | RABL3     | FAM101B | CLDND1   |
| NUCB2  | FRS3    | EDA2R   | C3orf70   | C1orf95 | C1GALT1  |
| GPR143 | CD3EAP  | CCDC90B | CRIPAK    | PLEKHM3 | LXN      |
| OAS1   | ADAM28  | SCOC    | GPRIN3    | PAIP2B  | C12orf5  |
| OAS2   | ARID5A  | TNN     | FRYL      | EIF2AK4 | JPH2     |
| OAS3   | HCST    | CIDEC   | RELL2     | FAM166B | RHBDD2   |
| OLR1   | CD300C  | GPSM3   | DCBLD1    |         | CC2D2A   |
| OSM    | NMU     | DMRTC2  | NSMCE2    |         | SHROOM3  |
| CLDN11 | CFHR4   | ANO3    | C8orf31   |         | GRAMD1A  |
| P2RX1  | GPR83   | MYO1G   | SCARA5    |         | KIAA1598 |
| P2RX5  | RUNDC3A | SLC28A3 | FAM133A   |         | HAMP     |
| P2RX7  | SUGT1   | GAL3ST2 | TRIM59    |         | WFDC1    |
| PA2G4  | UTS2    | SAMSN1  | C14orf39  |         | MS4A7    |
| PAK3   | GADD45G | SMOC1   | SNAI3     |         | NTN4     |
| PBX1   | SMPDL3A | LRRC4   | RAB7B     |         | APOBEC3G |
| PC     | BTG3    | CENPK   | CCDC84    |         | PRDM16   |
| PCNT   | LMAN2   | RTP4    | FAM19A2   |         | PARVG    |
| PDE3A  | ERP29   | TINAGL1 | ENPP7     |         | NOD2     |
| PDGFRL | SDS     | ZFYVE20 | C1orf174  |         | DPEP2    |
| PDK4   | SLC27A3 | NCAPG   | ZC3H12D   |         | MS4A6A   |
| PDZK1  | SLC27A2 | ERAP2   | TSPAN33   |         | ARHGAP9  |
| PENK   | LILRB4  | DNAJC1  | RSPO2     |         | UNKL     |
| PEX14  | LILRA1  | STRA6   | ANKRD33   |         | RASAL3   |



|          |          |          |           |           |
|----------|----------|----------|-----------|-----------|
| PFDN2    | LILRB3   | RNF25    | GLDN      | UPF3A     |
| VIT      | RBPMS    | WBSCR17  | FMN1      | NADK      |
| PGR      | STMN2    | DCLRE1C  | ATXN1L    | ZSCAN18   |
| ABCB1    | ESM1     | CLEC7A   | ZNF404    | LYNX1     |
| SERPINA1 | ADAMTS13 | HIAT1    | LOC344887 | PCYOX1L   |
| SERPINI2 | KRR1     | GORASP1  | MACC1     | YIPF2     |
| PIK3C2A  | HIBADH   | ATPAF1   | EP400NL   | EFHD2     |
| PIK3CB   | FAF1     | S100PBP  | RBPMS2    | GLB1L     |
| PIK3R2   | CD160    | CRTC3    | GEN1      | TNFAIP8L2 |
| PIN4     | POLR3A   | NMNAT1   | IRF2BP2   | ALG9      |
| PLA2G2A  | ZWINT    | ISL2     | DND1      | NUDT18    |
| PLAG1    | KPTN     | MRPS6    | NDUFS7    | DOK3      |
| FXVD1    | TBC1D8   | SLC26A10 | HDDC3     | DENND2D   |
| PLN      | PKIG     | REEP1    | C3orf62   | ZNF614    |
| PLP1     | FICD     | NOL6     | MAST4     | CXorf21   |
| PLXNA1   | PTP4A3   | STK33    | ZKSCAN4   | TRAF3IP3  |
| PMAIP1   | PSIP1    | CHID1    | RASL11A   | GRIP2     |
| PRRX1    | MAP4K1   | COLEC11  | SLC22A25  | COLEC12   |
| POLE     | INMT     | VKORC1   | TNFAIP8L3 | FAM49A    |
| POLH     | WIF1     | CENPM    | C16orf87  | FAM117A   |
| PPP2R1B  | GALNT6   | NUP37    | C1orf53   | NIPA2     |
| PPP2R2B  | GALNT5   | SPATA5L1 | VGLL3     | CAB39L    |
| PPP2R5C  | SEC63    | PVRIG    | C5orf46   | SLCO5A1   |
| PPP6C    | NXPH3    | ZFYVE21  | LOC389641 | ADPGK     |
| PRB1     | PACSIN2  | KCTD15   | OR52K3P   | FERMT3    |
| PRF1     | FILIP1L  | ALG8     | LOC399900 | NRIP2     |

|         |         |          |            |          |
|---------|---------|----------|------------|----------|
| PRKACA  | KLF8    | MLPH     | PCNXL3     | TM2D2    |
| PKIB    | POU6F2  | SLC25A23 | GTF2H5     | IMMP2L   |
| PRKAR2A | PNKP    | DHX58    | MXRA7      | MND1     |
| PRKG1   | B4GALT7 | FSD1     | MAP1LC3C   | SLC41A2  |
| MAPK10  | SLCO2B1 | IRX3     | MIAT       | ST6GAL2  |
| MAPK13  | CD300A  | ZNF557   | IQCF6      | AFAP1L2  |
| PRKRIR  | TMC6    | ZXDC     | C4orf47    | POLR2J4  |
| PRPH    | STK38   | CDC73    | FAM26F     | LMNB2    |
| PRSS3   | COG2    | SAP130   | TSPAN11    | HAVCR2   |
| RELN    | TFEC    | PGBD5    | STGC3      | ZDHHC12  |
| PSMA7   | ITGA11  | FAM118B  | DUXAP10    | LINGO1   |
| PSMB1   | IKZF3   | RNASEH2B | C8orf58    | ATOH8    |
| PTGS1   | HSPA4L  | SRD5A3   | C1orf145   | SYTL1    |
| PTK7    | VASH1   | MAP7D3   | ZNF704     | ZCRB1    |
| PTN     | AAK1    | RHBDF2   | LOC644135  | LRRCC1   |
| PTPN7   | NLRP1   | ZCCHC6   | ZCCHC18    | NAV1     |
| PTPN13  | ENPP4   | GAL3ST4  | ABCA17P    | TP53I13  |
| PTPRE   | MORC2   | GALNT12  | LOC727820  | ADCK2    |
| PTPRF   | ZHX2    | PALB2    | LOC727916  | LONRF1   |
| PTPRK   | ARSG    | NARS2    | LOC729173  | CABLES1  |
| PVRL2   | DKK1    | E2F8     | CCR2       | OXNAD1   |
| PYCR1   | EFR3B   | KCTD17   | LOC729683  | MYOCD    |
| PYGM    | RAB21   | TTL7     | LOC730101  | ARHGAP18 |
| QDPR    | GOLGA8A | ISOC2    | SNORD114-3 | SFXN1    |
| RAB5A   | KIF21B  | RERGL    | TMEM170B   | EPSTI1   |
| RAB5B   | GGA2    | FBXO31   | HGC6.3     | MRAP2    |

|         |          |          |              |          |
|---------|----------|----------|--------------|----------|
| RABIF   | TRIM35   | C12orf49 | LOC100130938 | CMTM7    |
| RAD51   | ARHGAP26 | SHCBP1   | LOC100132661 | SFT2D1   |
| RAN     | LRCH1    | C7orf63  | LOC100132735 | C1QTNF7  |
| RANGAP1 | FCHO1    | TMEM180  | C17orf96     | RAB42    |
| RAP1A   | MPRIIP   | TCTN2    |              | SFXN2    |
| RASGRF2 | GPD1L    | PODNL1   |              | AMICA1   |
| RBP1    | METAP1   | RIN3     |              | CMTM3    |
| RDH5    | CEP68    | ZNF671   |              | C1orf162 |
| PRPH2   | FBXL7    | THNSL1   |              | C22orf39 |
| RELA    | NUP210   | MRM1     |              | C4orf32  |
| DPF2    | KIAA0922 |          |              | ENPP6    |
|         | CLEC16A  |          |              | ABRA     |
|         |          |          |              | SELM     |
|         |          |          |              | MPP7     |
|         |          |          |              | SLC38A6  |
|         |          |          |              | C16orf89 |
|         |          |          |              | KIF18B   |
|         |          |          |              | TMC8     |
|         |          |          |              | ZNF548   |
|         |          |          |              | TMEM56   |
|         |          |          |              | ZNF362   |
|         |          |          |              | NFAM1    |
|         |          |          |              | PPM1L    |
|         |          |          |              | RDH10    |
|         |          |          |              | TLL11    |
|         |          |          |              | FREM1    |

PRUNE2  
SLC39A11  
FBXO15  
MED19  
TMEM136  
MPEG1  
SLC16A9  
PHYHD1  
NAPSB  
ALS2CL  
RASSF3  
LOC283861  
FAM150B  
RNF180  
MMAB  
IGFBPL1  
DPY19L2P2  
TMEM200B  
C4orf48  
C8orf59  
TNAP  
LOC729970

**Table S5\_BLUE\_GO\_KEGG**

**Enrichment analysis of GO among DEGs in blue module**

| ID       | description           | size | overlap | enrichment ratio | pValue  | FDR    | geneID                                                                                                                                                                                                                                                 |
|----------|-----------------------|------|---------|------------------|---------|--------|--------------------------------------------------------------------------------------------------------------------------------------------------------------------------------------------------------------------------------------------------------|
| GO:06955 | immune response       | 19   | 10      | 2.22             | 7.1E-07 | 0.0064 | ADORA2B;CD80;CD86;CCR5;CFD;DSP;FCGR1B;HK3;LAIR1;CD180;OLR1;P2RX1;RGS1;RNASE2;CCL18;CCL20;TLR1;MARCO;PSTPIP1;LY86;CXCL14;APOBEC3B;EBI3;CCL26;BATF;LILRB4;SIGLEC9;SIT1;ADAMDEC1;BIN2;TREM2;ITLN1;SLAMF8;CXCL16;CLEC7A;PRAM1;SIGLEC10;CD300LF;CLEC4C;GAPT |
| GO:07155 | cell adhesion         | 36   | 30      | 2.34             | 9.1E-06 | 0.0249 | CD80;CD86;CDH3;DPT;DSP;GPM6B;TNC;IBSP;MCAM;MFAP4;MPZ;MYOC;OLR1;VIT;RELN;SPP1;ADAM12;PSTPIP1;MYOT;EBI3;LAMC3;LILRB4;SLC7A11;GREM1;SIGLEC9;ADAMDEC1;PCDH11X;CUZD1;WNT4;SIGLEC10                                                                          |
| GO:22610 | biological adhesion   | 37   | 30      | 2.32             | 1.0E-05 | 0.0249 | CD80;CD86;CDH3;DPT;DSP;GPM6B;TNC;IBSP;MCAM;MFAP4;MPZ;MYOC;OLR1;VIT;RELN;SPP1;ADAM12;PSTPIP1;MYOT;EBI3;LAMC3;LILRB4;SLC7A11;GREM1;SIGLEC9;ADAMDEC1;PCDH11X;CUZD1;WNT4;SIGLEC10                                                                          |
| GO:06954 | inflammatory response | 71   | 20      | 2.97             | 1.2E-05 | 0.0249 | ADORA2B;ADORA3;AGTR1;CCR5;FABP4;CD180;OLR1;P2RX1;PLP1;CCL18;CCL20;SPP1;TLR1;SCG2;PSTPIP1;LY86;CCL26;SLAMF8;CLEC7A;SIGLEC10                                                                                                                             |
| GO       | leukocyte             | 12   | 2       | 2.43             | 1.3     | 0.0    | ADORA2B;CD80;CD86;CFD;DSP;HK3;LAIR1;CD180;OLR1;P2RX1;RNASE2;SOX11;TLR1;EBI3;B                                                                                                                                                                          |

|     |              |   |   |      |     |     |                                                                                |
|-----|--------------|---|---|------|-----|-----|--------------------------------------------------------------------------------|
| :00 | activation   | 1 | 7 | 5940 | 7E- | 249 | ATF;LILRB4;SIGLEC9;SIT1;IL21R;BIN2;WNT4;SLAMF8;CLEC7A;PRAM1;CD300LF;CLEC4C;GA  |
| 453 |              | 8 |   | 748  | 05  | 583 | PT                                                                             |
| 21  |              | 4 |   |      |     | 08  |                                                                                |
| GO  | extracellula |   |   |      |     | 0.0 |                                                                                |
| :00 | r matrix     | 3 | 1 | 4.00 | 2.3 | 290 |                                                                                |
| 301 | organizatio  | 4 | 3 | 1921 | 7E- | 945 | COL10A1;COL11A1;DPT;GPM6B;TNC;IBSP;MFAP4;MYH11;VIT;SPP1;ADAM12;LAMC3;GREM1     |
| 98  | n            | 7 |   | 23   | 05  | 64  |                                                                                |
| GO  | extracellula |   |   |      |     | 0.0 |                                                                                |
| :00 | r structure  | 4 | 1 | 3.73 | 2.4 | 290 | AGTR1;COL10A1;COL11A1;DPT;GPM6B;TNC;IBSP;MFAP4;MYH11;VIT;SPP1;ADAM12;LAMC3;    |
| 430 | organizatio  | 0 | 4 | 8717 | 3E- | 945 | GREM1                                                                          |
| 62  | n            | 0 |   | 949  | 05  | 64  |                                                                                |
| GO  |              | 1 |   |      |     | 0.0 |                                                                                |
| :00 | defense      | 5 | 3 | 2.18 | 2.5 | 290 | ADORA2B;ADORA3;AGTR1;CCR5;CFD;FABP4;FCGR1B;KLRC3;CD180;OLR1;P2RX1;PLP1;RNA     |
| 069 | response     | 1 | 1 | 1446 | 6E- | 945 | SE2;CCL18;CCL20;SPP1;TLR1;SCG2;MARCO;PSTPIP1;LY86;APOBEC3B;CCL26;BATF;TREM2;S  |
| 52  |              | 8 |   | 573  | 05  | 64  | LAMF8;CXCL16;CLEC7A;SIGLEC10;CD300LF;CLEC4C                                    |
| GO  | supramolec   |   |   |      |     | 0.0 |                                                                                |
| :00 | ular fiber   | 6 | 1 | 3.00 | 3.1 | 315 | ACTA1;CASQ2;COL11A1;DPT;DSP;FGF13;KRT14;MFAP4;MYH11;MYOC;NEFH;RGS4;MYOM1;      |
| 974 | organizatio  | 4 | 8 | 4326 | 3E- | 875 | PSTPIP1;CCL26;LMOD1;GREM1;WNT4                                                 |
| 35  | n            | 0 |   | 923  | 05  | 63  |                                                                                |
| GO  |              | 1 |   |      |     | 0.0 |                                                                                |
| :00 | cell         | 3 | 2 | 2.24 | 4.2 | 369 | ADORA2B;CD80;CD86;CFD;DSP;HK3;LAIR1;CD180;OLR1;P2RX1;RNASE2;SOX11;TLR1;EBI3;B  |
| 017 | activation   | 3 | 8 | 0430 | 4E- | 451 | ATF;LILRB4;SLC7A11;SIGLEC9;SIT1;IL21R;BIN2;WNT4;SLAMF8;CLEC7A;PRAM1;CD300LF;CL |
| 75  |              | 5 |   | 231  | 05  | 19  | EC4C;GAPT                                                                      |

## Enrichment analysis of KEGG among DEGs in blue module

| ID               | description                                       | so<br>i<br>z<br>e | o<br>v<br>er<br>la<br>p | enric<br>hme<br>ntRa<br>tio | pV<br>alu<br>e          | FD<br>R                 | geneID                                       |
|------------------|---------------------------------------------------|-------------------|-------------------------|-----------------------------|-------------------------|-------------------------|----------------------------------------------|
| hsa<br>045<br>12 | ECM-recep<br>tor<br>interaction                   | 8<br>2            | 5                       | 7.38<br>9227<br>642         | 5.4<br>2E-<br>04        | 0.1<br>767<br>000<br>16 | TNC;IBSP;RELN;SPP1;LAMC3                     |
| hsa<br>040<br>62 | Chemokine<br>signaling<br>pathway                 | 1<br>8<br>9       | 6                       | 3.84<br>7089<br>947         | 0.0<br>044<br>475<br>89 | 0.6<br>802<br>719<br>2  | CCR5;CCL18;CCL20;CXCL14;CCL26;CXCL16         |
| hsa<br>040<br>80 | Neuroactive<br>ligand-rece<br>ptor<br>interaction | 2<br>7<br>7       | 7                       | 3.06<br>2394<br>705         | 0.0<br>074<br>058<br>09 | 0.6<br>802<br>719<br>2  | ADORA2B;ADORA3;AGTR1;NPY1R;P2RX1;GPR83;RXFP1 |
| hsa<br>040<br>60 | Cytokine-c<br>ytokine<br>receptor<br>interaction  | 2<br>9<br>4       | 7                       | 2.88<br>5317<br>46          | 0.0<br>101<br>240<br>53 | 0.6<br>802<br>719<br>2  | CCR5;CCL18;CCL20;CXCL14;CCL26;IL21R;CXCL16   |
| hsa<br>046<br>20 | Toll-like<br>receptor<br>signaling                | 1<br>0<br>4       | 4                       | 4.66<br>0897<br>436         | 0.0<br>104<br>336       | 0.6<br>802<br>719       | CD80;CD86;SPP1;TLR1                          |

|     |            |   |        |     |   |                          |  |
|-----|------------|---|--------|-----|---|--------------------------|--|
|     | pathway    |   |        | 18  | 2 |                          |  |
|     |            |   |        | 0.0 |   |                          |  |
| hsa | Focal      | 1 | 3.04   | 236 |   |                          |  |
| 045 | adhesion   | 9 | 5 4807 | 306 | 1 | TNC;IBSP;RELN;SPP1;LAMC3 |  |
| 10  |            | 9 | 37     | 84  |   |                          |  |
|     |            |   |        | 0.0 |   |                          |  |
| hsa | Cell       | 1 | 3.36   | 305 |   |                          |  |
| 045 | adhesion   | 4 | 4 6203 | 955 | 1 | CD80;CD86;CDH3;MPZ       |  |
| 14  | molecules  | 4 | 704    | 61  |   |                          |  |
|     | (CAMs)     |   |        | 0.0 |   |                          |  |
| hsa |            | 1 | 3.18   | 362 |   |                          |  |
| 041 | Phagosome  | 5 | 4 9035 | 761 | 1 | MSR1;OLR1;MARCO;CLEC7A   |  |
| 45  |            | 2 | 088    | 21  |   |                          |  |
|     |            |   |        | 0.0 |   |                          |  |
| hsa | Protein    |   | 4.03   | 378 |   |                          |  |
| 049 | digestion  | 9 | 3 9444 | 291 | 1 | COL10A1;COL11A1;SLC16A10 |  |
| 74  | and        | 0 | 444    | 38  |   |                          |  |
|     | absorption |   |        | 0.0 |   |                          |  |
| hsa |            |   | 4.03   | 378 |   |                          |  |
| 053 | Rheumatoid | 9 | 3 9444 | 291 | 1 | CD80;CD86;CCL20          |  |
| 23  | arthritis  | 0 | 444    | 38  |   |                          |  |



**Table S6\_PINK\_GO\_KEGG**

**Enrichment analysis of GO among DEGs in pink module**

| ID         | description                                     | size | overlap | enrichmentRatio | pValue   | FDR         | geneID                                                                            |
|------------|-------------------------------------------------|------|---------|-----------------|----------|-------------|-----------------------------------------------------------------------------------|
| GO:0006954 | inflammatory response                           | 71   | 11      | 8.246906915     | 3.34E-08 | 3.03E-04    | ACP5;C1QB;C1QC;FCER1G;FPR3;CXCL1;HMOX1;TLR2;PLA2G7;AOC3;CD163                     |
| GO:0006952 | defense response                                | 15   | 14      | 4.957626758     | 1.53E-07 | 6.95E-04    | ACP5;C1QB;C1QC;FCER1G;FPR3;CXCL1;HMOX1;TLR2;PLA2G7;AOC3;CD163;LILRB1;VSIG4;CLEC5A |
| GO:0061082 | myeloid leukocyte cytokine production           | 31   | 3       | 52.02081165     | 2.53E-05 | 0.060684763 | FCER1G;HMOX1;LILRB1                                                               |
| GO:0002367 | cytokine production involved in immune response | 99   | 4       | 21.71912675     | 3.26E-05 | 0.060684763 | FCER1G;HMOX1;TLR2;LILRB1                                                          |
| GO:0032763 | regulation of mast cell cytokine production     | 5    | 2       | 215.0193548     | 3.34E-05 | 0.060684763 | FCER1G;HMOX1                                                                      |
| GO:0050727 | regulation of inflammatory response             | 36   | 6       | 8.934322223     | 4.62E-05 | 0.063476799 | ACP5;C1QB;C1QC;FCER1G;TLR2;PLA2G7                                                 |
| GO:0002684 | positive regulation of immune system process    | 97   | 9       | 4.941711424     | 5.00E-05 | 0.063476799 | C1QB;C1QC;FCER1G;FPR3;HMOX1;TLR2;PLA2G7;LILRB1;VSIG4                              |
| GO:0002443 | leukocyte mediated immunity                     | 76   | 8       | 5.658404075     | 5.59E-05 | 0.063476799 | C1QB;C1QC;FCER1G;CXCL1;HMOX1;TLR2;LILRB1;CLEC5A                                   |
| GO:0032762 | mast cell cytokine production                   | 7    | 2       | 153.5852535     | 6.99E-05 | 0.064643233 | FCER1G;HMOX1                                                                      |
| GO:0032653 | regulation of interleukin-10 production         | 46   | 3       | 35.05750351     | 8.38E-05 | 0.064643233 | FCER1G;TLR2;LILRB1                                                                |

## Enrichment analysis of KEGG among DEGs in pink module

| ID       | description                               | size | overlap | enrichmentRatio | pValue      | FDR         | geneID          |
|----------|-------------------------------------------|------|---------|-----------------|-------------|-------------|-----------------|
| hsa05150 | Staphylococcus aureus infection           | 56   | 3       | 20.50093985     | 3.84E-04    | 0.12527055  | C1QB;C1QC;FPR3  |
| hsa04610 | Complement and coagulation cascades       | 79   | 3       | 14.53231179     | 0.00105535  | 0.167302914 | C1QB;C1QC;VSIG4 |
| hsa05323 | Rheumatoid arthritis                      | 90   | 3       | 12.75614035     | 0.001539597 | 0.167302914 | ACP5;CXCL1;TLR2 |
| hsa05142 | Chagas disease (American trypanosomiasis) | 10   | 3       | 11.25541796     | 0.002205996 | 0.179788711 | C1QB;C1QC;TLR2  |
| hsa05020 | Prion diseases                            | 35   | 2       | 21.86766917     | 0.003656668 | 0.23841474  | C1QB;C1QC       |
| hsa00260 | Glycine, serine and threonine metabolism  | 40   | 2       | 19.13421053     | 0.004756485 | 0.258435661 | PGAM2;AOC3      |
| hsa05134 | Legionellosis                             | 55   | 2       | 13.91578947     | 0.008847014 | 0.412018075 | CXCL1;TLR2      |
| hsa01230 | Biosynthesis of amino acids               | 75   | 2       | 10.20491228     | 0.016027355 | 0.520430775 | BCAT1;PGAM2     |
| hsa05133 | Pertussis                                 | 76   | 2       | 10.07063712     | 0.016435044 | 0.520430775 | C1QB;C1QC       |
| hsa04260 | Cardiac muscle contraction                | 78   | 2       | 9.812415655     | 0.017263779 | 0.520430775 | RYR2;TNNC1      |
